# Supplementary material
Source: publisher figshare collection journal article supplement (https://acs.figshare.com/ndownloader/files/4560625)
Supplement: Supplementary file 1 [file 4560625]

#==============================================================================
data_global
#==============================================================================
 
_publ_contact_author_name     'Dr. James D. Wilton-Ely'
_publ_contact_author_address
;
Chemistry Research Laboratory,
University of Oxford,
Mansfield Road, 
Oxford OX1 3TA. UK.
;
_publ_contact_author_email     james.wilton-ely@chem.ox.ac.uk

loop_
_publ_author_name
_publ_author_address
'Knight, Edward R.'
;    
Chemistry Research Laboratory,
University of Oxford,
Mansfield Road, 
Oxford OX1 3TA. UK.
;
'Thompson, Amber L.'
;    
Chemistry Research Laboratory,
University of Oxford,
Mansfield Road, 
Oxford OX1 3TA. UK.
;
'Hogarth, Graeme'
;
Department of Chemistry, 
University College London, 
20 Gordon Street, 
London WC1H 0AJ.
;
'Wilton-Ely, James D. E. T.'
;    
Chemistry Research Laboratory,
University of Oxford,
Mansfield Road, 
Oxford OX1 3TA. UK.
;

_journal_name_full                 
'European Journal of Inorganic Chemistry'

_publ_section_title
;
Multimetallic arrays: Symmetrical and unsymmetrical 
bi-, tri- and hexametallic complexes based on gold(I) and 
gold(III).
;

_publ_section_abstract
;  
Treatment of [ClAu(PPh3)] with the double salt KS2CNC4H8NCS2K leads to the 
formation of the neutral complex [{(Ph3P)Au}2(S2CNC4H8NCS2)] through 
displacement of the chloride ligands. A heterobimetallic variant, 
[(dppm)2Ru(S2CNC4H8NCS2)Au(PPh3)]+, can be prepared by the sequential 
reaction of [(dppm)2Ru(S2CNC4H8NH2)]2+ with NEt3 and CS2 followed by 
[ClAu(PPh3)]. Reaction of the same ruthenium precursor with [(dppm)(AuCl)2] 
under the same conditions yields the trimetallic complex 
[(dppm)2Ru(S2CNC4H8NCS2)Au2(dppm)]2+. Attempts to prepare the compound 
[(dppm)Au2(S2CNC4H8NH2)]2+ from [(dppm)(AuCl)2] led to isolation of 
the known complex [{(dppm)Au2}2(S2CNC4H8NCS2)]2+ via a symmetrisation 
pathway. The hexametallic complex [{(dppf)Au2}2(S2CNC4H8NCS2)]2+ was 
successfully prepared from [(dppf)(AuCl)2] and crystallographically 
characterised. In addition, an example of a gold(III) trimetallic, 
[{(dppm)2Ru(S2CNC4H8NCS2)}2Au]3+, was also synthesised.
;


#==============================================================================
data_2 
#==============================================================================
  
_chemical_name_systematic 
; 
 . 
; 
_chemical_name_common             . 
_chemical_melting_point           'not measured' 
_chemical_formula_moiety 
 'C74 H64 Au4 Fe2 N2 P4 S4, 1.75(C4 H10 O), 2(P F6)' 
_chemical_formula_sum 
 'C81 H81.50 Au4 F12 Fe2 N2 O1.75 P6 S4' 
_chemical_formula_weight          2552.66 
  
loop_ 
 _atom_type_symbol 
 _atom_type_description 
 _atom_type_scat_dispersion_real 
 _atom_type_scat_dispersion_imag 
 _atom_type_scat_source 
 'C'  'C'   0.0033   0.0016 
 'International Tables Vol C Tables 4.2.6.8 and 6.1.1.4' 
 'H'  'H'   0.0000   0.0000 
 'International Tables Vol C Tables 4.2.6.8 and 6.1.1.4' 
 'N'  'N'   0.0061   0.0033 
 'International Tables Vol C Tables 4.2.6.8 and 6.1.1.4' 
 'F'  'F'   0.0171   0.0103 
 'International Tables Vol C Tables 4.2.6.8 and 6.1.1.4' 
 'P'  'P'   0.1023   0.0942 
 'International Tables Vol C Tables 4.2.6.8 and 6.1.1.4' 
 'S'  'S'   0.1246   0.1234 
 'International Tables Vol C Tables 4.2.6.8 and 6.1.1.4' 
 'Fe'  'Fe'   0.3463   0.8444 
 'International Tables Vol C Tables 4.2.6.8 and 6.1.1.4' 
 'Au'  'Au'  -2.0133   8.8022 
 'International Tables Vol C Tables 4.2.6.8 and 6.1.1.4' 
 'O'  'O'   0.0106   0.0060 
 'International Tables Vol C Tables 4.2.6.8 and 6.1.1.4' 
  
_symmetry_cell_setting            Orthorhombic 
_symmetry_space_group_name_H-M    Pca2(1) 
_symmetry_space_group_name_Hall   'P 2c -2ac' 
  
loop_ 
 _symmetry_equiv_pos_as_xyz 
 'x, y, z' 
 '-x, -y, z+1/2' 
 'x+1/2, -y, z' 
 '-x+1/2, y, z+1/2' 
  
_cell_length_a                    35.0136(3) 
_cell_length_b                    11.0802(1) 
_cell_length_c                    22.1520(2) 
_cell_angle_alpha                 90.00 
_cell_angle_beta                  90.00 
_cell_angle_gamma                 90.00 
_cell_volume                      8594.04(13) 
_cell_formula_units_Z             4 
_cell_measurement_temperature     150(2) 
_cell_measurement_reflns_used     10671 
_cell_measurement_theta_min       5.097 
_cell_measurement_theta_max       27.878 
  
_exptl_crystal_description        block 
_exptl_crystal_colour             clear_intense_orange 
_exptl_crystal_size_max           0.30 
_exptl_crystal_size_mid           0.12 
_exptl_crystal_size_min           0.09 
_exptl_crystal_density_meas       'not measured' 
_exptl_crystal_density_diffrn     1.970 
_exptl_crystal_density_method     'not measured' 
_exptl_crystal_F_000              4902 
_exptl_absorpt_coefficient_mu     7.413 
_exptl_absorpt_correction_type    multi-scan 
_exptl_absorpt_correction_T_min   0.301 
_exptl_absorpt_correction_T_max   0.513 
_exptl_absorpt_process_details 
; 
Multi-scan from symmetry-related measurements using 
Sortav (Blessing 1995). 
; 
  
_exptl_special_details 
; 
The data collection nominally covered a hemisphere 
of reciprocal Space, by a combination of \w and \f scans. 
; 
  
_diffrn_ambient_temperature       150(2) 
_diffrn_radiation_wavelength      0.71073 
_diffrn_radiation_type            MoK\a 
_diffrn_radiation_source          'fine-focus sealed tube' 
_diffrn_radiation_monochromator   graphite 
_diffrn_measurement_device_type   'KappaCCD' 
_diffrn_measurement_method        'CCD' 
_diffrn_detector_area_resol_mean  9 
_diffrn_standards_number          . 
_diffrn_standards_interval_count  . 
_diffrn_standards_interval_time   . 
_diffrn_standards_decay_%         . 
_diffrn_reflns_number             60097 
_diffrn_reflns_av_R_equivalents   0.0820 
_diffrn_reflns_av_sigmaI/netI     0.0693 
_diffrn_reflns_limit_h_min        -46 
_diffrn_reflns_limit_h_max        46 
_diffrn_reflns_limit_k_min        -14 
_diffrn_reflns_limit_k_max        14 
_diffrn_reflns_limit_l_min        -25 
_diffrn_reflns_limit_l_max        29 
_diffrn_reflns_theta_min          5.16 
_diffrn_reflns_theta_max          27.89 
_reflns_number_total              18911 
_reflns_number_gt                 16211 
_reflns_threshold_expression      >2sigma(I) 
  
_computing_data_collection        'Collect (Nonius BV, 1997-2000)' 
_computing_cell_refinement        'HKL Scalepack (Otwinowski & Minor 1997)' 
_computing_data_reduction 
 'HKL Denzo and Scalepack (Otwinowski & Minor 1997)' 
_computing_structure_solution     'SHELXS-97 (Sheldrick, 1997)' 
_computing_structure_refinement   'SHELXL-97 (Sheldrick, 1997)' 
_computing_molecular_graphics     'Bruker SHELXTL' 
_computing_publication_material   'Bruker SHELXTL' 
  
_refine_special_details 
; 
 Refinement of F^2^ against ALL reflections.  The weighted R-factor wR and 
 goodness of fit S are based on F^2^, conventional R-factors R are based 
 on F, with F set to zero for negative F^2^. The threshold expression of 
 F^2^ > 2sigma(F^2^) is used only for calculating R-factors(gt) etc. and is 
 not relevant to the choice of reflections for refinement.  R-factors based 
 on F^2^ are statistically about twice as large as those based on F, and R- 
 factors based on ALL data will be even larger. 

 Prolate fluorine ADPs and the presence of additional peaks between them 
 together with a prolate phosphorus ADP suggested the presence of disorder 
 in the PF~6~.  This was modelled with a two-component model (60:40 
 occupancy).  Initially, isotropic ADPs for the fluorine atoms were 
 constrained to the same value and same distance restraints were used to
 maintain a sensible geometry while the occupancy was refined.  However, 
 this became unstable, due to the high degree of overlap of the electron
 density for the two components.  For this reason, the occupancy was 
 fixed to a sensible value.  Considerable efforts were made to improve 
 this further but the best refinement was obtained by refining a single 
 isotropic temperature factor for all fluorine atoms with separate
 isotropic temperature factors for the two phosphorus atoms.  Once the 
 refinement was complete, the disordered PF~6~ was removed and 
 PLATON/SQUEEZE used to compare the effect of modelling the disorder
 using the Fourier transforms of the electron density with the disordered
 atomic model.  Changes in the agreement factors were generally of the 
 order of 0.5-1%.

 Thermal parameters for the ether molecule initially looked inflated, so
 the occupancy for this was refined with a marked improvement in the 
 R-indices.  Simultaneous refinement of anisotropic displacement 
 parameters and site occupancy factors made the refinement unstable, so
 the occupancy was fixed at 0.75.
; 
  
_refine_ls_structure_factor_coef  Fsqd 
_refine_ls_matrix_type            full 
_refine_ls_weighting_scheme       calc 
_refine_ls_weighting_details 
 'calc w=1/[\s^2^(Fo^2^)+(0.0428P)^2^+6.2094P] where P=(Fo^2^+2Fc^2^)/3' 
_atom_sites_solution_primary      direct 
_atom_sites_solution_secondary    difmap 
_atom_sites_solution_hydrogens    geom 
_refine_ls_hydrogen_treatment     constr 
_refine_ls_extinction_method      none 
_refine_ls_extinction_coef        . 
_refine_ls_abs_structure_details 
 'Flack H D (1983), Acta Cryst. A39, 876-881; 8531 Friedel pairs' 
_refine_ls_abs_structure_Flack    -0.002(4) 
_refine_ls_number_reflns          18911 
_refine_ls_number_parameters      989 
_refine_ls_number_restraints      413 
_refine_ls_R_factor_all           0.0547 
_refine_ls_R_factor_gt            0.0415 
_refine_ls_wR_factor_ref          0.0940 
_refine_ls_wR_factor_gt           0.0886 
_refine_ls_goodness_of_fit_ref    1.032 
_refine_ls_restrained_S_all       1.045 
_refine_ls_shift/su_max           0.002 
_refine_ls_shift/su_mean          0.000 
  
loop_ 
 _atom_site_label 
 _atom_site_type_symbol 
 _atom_site_fract_x 
 _atom_site_fract_y 
 _atom_site_fract_z 
 _atom_site_U_iso_or_equiv 
 _atom_site_adp_type 
 _atom_site_occupancy 
 _atom_site_symmetry_multiplicity 
 _atom_site_calc_flag 
 _atom_site_refinement_flags 
 _atom_site_disorder_assembly 
 _atom_site_disorder_group 
Au1 Au 0.061627(9) 0.60653(3) 0.781971(15) 0.02632(8) Uani 1 1 d . . . 
Au2 Au 0.119251(8) 0.45022(3) 0.718564(15) 0.02570(7) Uani 1 1 d . . . 
Au3 Au 0.233460(8) 1.40552(3) 0.708045(15) 0.02484(7) Uani 1 1 d . . . 
Au4 Au 0.311276(9) 1.29382(3) 0.731355(16) 0.02904(8) Uani 1 1 d . . . 
Fe1 Fe 0.02490(3) 0.21361(10) 0.79270(5) 0.0254(3) Uani 1 1 d . . . 
Fe2 Fe 0.32859(3) 1.66034(11) 0.64417(6) 0.0281(3) Uani 1 1 d . . . 
S1 S 0.09132(5) 0.75151(18) 0.72246(11) 0.0297(4) Uani 1 1 d . . . 
S2 S 0.15921(6) 0.59446(18) 0.76107(10) 0.0274(5) Uani 1 1 d . . . 
S3 S 0.21522(6) 1.27526(18) 0.78579(10) 0.0288(4) Uani 1 1 d . . . 
S4 S 0.27412(6) 1.12251(17) 0.71734(13) 0.0344(5) Uani 1 1 d . . . 
P1 P 0.03142(6) 0.4966(2) 0.85395(10) 0.0263(5) Uani 1 1 d . . . 
P2 P 0.08715(6) 0.29000(19) 0.67946(10) 0.0232(4) Uani 1 1 d . . . 
P3 P 0.24141(6) 1.5251(2) 0.62593(10) 0.0262(5) Uani 1 1 d . . . 
P4 P 0.35862(6) 1.43209(19) 0.74096(11) 0.0269(5) Uani 1 1 d . . . 
N1 N 0.15997(19) 0.8294(6) 0.7503(3) 0.0301(16) Uani 1 1 d . . . 
N2 N 0.2093(2) 1.0430(6) 0.7583(3) 0.0297(16) Uani 1 1 d . . . 
C1 C 0.1384(2) 0.7336(8) 0.7448(4) 0.0267(18) Uani 1 1 d . . . 
C2 C 0.1454(2) 0.9562(7) 0.7449(4) 0.0284(19) Uani 1 1 d . . . 
H2A H 0.1455 0.9806 0.7019 0.034 Uiso 1 1 calc R . . 
H2B H 0.1188 0.9598 0.7596 0.034 Uiso 1 1 calc R . . 
C3 C 0.1696(2) 1.0420(7) 0.7806(4) 0.0304(19) Uani 1 1 d . . . 
H3A H 0.1587 1.1243 0.7775 0.036 Uiso 1 1 calc R . . 
H3B H 0.1693 1.0180 0.8236 0.036 Uiso 1 1 calc R . . 
C4 C 0.2231(2) 0.9264(8) 0.7372(5) 0.040(2) Uani 1 1 d . . . 
H4A H 0.2504 0.9179 0.7478 0.048 Uiso 1 1 calc R . . 
H4B H 0.2209 0.9230 0.6927 0.048 Uiso 1 1 calc R . . 
C5 C 0.2008(2) 0.8215(8) 0.7647(5) 0.039(2) Uani 1 1 d . . . 
H5A H 0.2111 0.7444 0.7491 0.046 Uiso 1 1 calc R . . 
H5B H 0.2041 0.8220 0.8091 0.046 Uiso 1 1 calc R . . 
C6 C 0.2310(2) 1.1409(8) 0.7551(4) 0.0294(19) Uani 1 1 d . . . 
C7 C 0.0654(3) 0.4381(8) 0.9096(4) 0.030(2) Uani 1 1 d . . . 
C8 C 0.0521(3) 0.3787(8) 0.9605(4) 0.034(2) Uani 1 1 d . . . 
H8 H 0.0255 0.3728 0.9685 0.041 Uiso 1 1 calc R . . 
C9 C 0.0787(3) 0.3281(8) 0.9995(4) 0.042(3) Uani 1 1 d . . . 
H9 H 0.0701 0.2849 1.0340 0.050 Uiso 1 1 calc R . . 
C10 C 0.1169(3) 0.3395(10) 0.9890(5) 0.049(3) Uani 1 1 d . . . 
H10 H 0.1347 0.3041 1.0161 0.059 Uiso 1 1 calc R . . 
C11 C 0.1298(3) 0.4025(11) 0.9393(6) 0.057(3) Uani 1 1 d . . . 
H11 H 0.1564 0.4112 0.9321 0.069 Uiso 1 1 calc R . . 
C12 C 0.1036(3) 0.4526(9) 0.9000(4) 0.038(2) Uani 1 1 d . . . 
H12 H 0.1123 0.4974 0.8661 0.045 Uiso 1 1 calc R . . 
C13 C -0.0006(2) 0.5937(9) 0.8959(4) 0.031(2) Uani 1 1 d . . . 
C14 C -0.0360(3) 0.5567(10) 0.9152(4) 0.040(2) Uani 1 1 d . . . 
H14 H -0.0442 0.4765 0.9072 0.047 Uiso 1 1 calc R . . 
C15 C -0.0602(3) 0.6351(12) 0.9464(5) 0.050(3) Uani 1 1 d . . . 
H15 H -0.0846 0.6089 0.9598 0.059 Uiso 1 1 calc R . . 
C16 C -0.0482(4) 0.7495(12) 0.9571(5) 0.060(3) Uani 1 1 d . . . 
H16 H -0.0648 0.8034 0.9776 0.072 Uiso 1 1 calc R . . 
C17 C -0.0112(3) 0.7923(10) 0.9387(5) 0.049(3) Uani 1 1 d . . . 
H17 H -0.0027 0.8720 0.9472 0.059 Uiso 1 1 calc R . . 
C18 C 0.0112(3) 0.7103(9) 0.9080(4) 0.041(2) Uani 1 1 d . . . 
H18 H 0.0357 0.7351 0.8945 0.049 Uiso 1 1 calc R . . 
C19 C 0.1186(2) 0.1976(7) 0.6316(4) 0.0248(17) Uani 1 1 d . . . 
C20 C 0.1571(2) 0.2043(8) 0.6420(4) 0.0286(19) Uani 1 1 d . . . 
H20 H 0.1667 0.2563 0.6725 0.034 Uiso 1 1 calc R . . 
C21 C 0.1822(2) 0.1345(8) 0.6077(4) 0.035(2) Uani 1 1 d . . . 
H21 H 0.2089 0.1394 0.6146 0.042 Uiso 1 1 calc R . . 
C22 C 0.1684(3) 0.0595(8) 0.5644(4) 0.035(2) Uani 1 1 d . . . 
H22 H 0.1854 0.0108 0.5416 0.042 Uiso 1 1 calc R . . 
C23 C 0.1298(3) 0.0538(9) 0.5535(4) 0.038(2) Uani 1 1 d . . . 
H23 H 0.1205 0.0030 0.5223 0.045 Uiso 1 1 calc R . . 
C24 C 0.1044(2) 0.1211(8) 0.5874(4) 0.0285(19) Uani 1 1 d . . . 
H24 H 0.0776 0.1151 0.5805 0.034 Uiso 1 1 calc R . . 
C25 C 0.0454(2) 0.3305(8) 0.6351(4) 0.0299(19) Uani 1 1 d . . . 
C26 C 0.0410(3) 0.4518(8) 0.6194(4) 0.033(2) Uani 1 1 d . . . 
H26 H 0.0598 0.5090 0.6312 0.040 Uiso 1 1 calc R . . 
C27 C 0.0090(3) 0.4896(9) 0.5864(4) 0.038(2) Uani 1 1 d . . . 
H27 H 0.0061 0.5717 0.5750 0.045 Uiso 1 1 calc R . . 
C28 C -0.0184(3) 0.4045(9) 0.5706(4) 0.040(2) Uani 1 1 d . . . 
H28 H -0.0404 0.4293 0.5488 0.048 Uiso 1 1 calc R . . 
C29 C -0.0141(3) 0.2847(10) 0.5860(4) 0.039(2) Uani 1 1 d . . . 
H29 H -0.0328 0.2271 0.5746 0.047 Uiso 1 1 calc R . . 
C30 C 0.0181(3) 0.2488(8) 0.6184(4) 0.032(2) Uani 1 1 d . . . 
H30 H 0.0211 0.1663 0.6290 0.039 Uiso 1 1 calc R . . 
C31 C 0.2584(2) 1.4408(8) 0.5608(4) 0.0289(19) Uani 1 1 d . . . 
C32 C 0.2573(3) 1.4919(10) 0.5044(4) 0.040(2) Uani 1 1 d . . . 
H32 H 0.2503 1.5743 0.5005 0.048 Uiso 1 1 calc R . . 
C33 C 0.2663(3) 1.4260(11) 0.4528(4) 0.046(3) Uani 1 1 d . . . 
H33 H 0.2664 1.4635 0.4142 0.055 Uiso 1 1 calc R . . 
C34 C 0.2754(3) 1.3025(10) 0.4589(5) 0.046(3) Uani 1 1 d . . . 
H34 H 0.2806 1.2553 0.4241 0.055 Uiso 1 1 calc R . . 
C35 C 0.2767(3) 1.2496(10) 0.5159(5) 0.042(2) Uani 1 1 d . . . 
H35 H 0.2832 1.1669 0.5203 0.050 Uiso 1 1 calc R . . 
C36 C 0.2682(2) 1.3203(8) 0.5669(4) 0.034(2) Uani 1 1 d . . . 
H36 H 0.2693 1.2851 0.6060 0.040 Uiso 1 1 calc R . . 
C37 C 0.1958(2) 1.5816(8) 0.5997(4) 0.0283(19) Uani 1 1 d . . . 
C38 C 0.1852(3) 1.7021(8) 0.6047(4) 0.033(2) Uani 1 1 d . . . 
H38 H 0.2028 1.7601 0.6197 0.039 Uiso 1 1 calc R . . 
C39 C 0.1484(3) 1.7372(9) 0.5875(4) 0.038(2) Uani 1 1 d . . . 
H39 H 0.1413 1.8198 0.5896 0.045 Uiso 1 1 calc R . . 
C40 C 0.1220(3) 1.6511(10) 0.5672(4) 0.041(2) Uani 1 1 d . . . 
H40 H 0.0968 1.6743 0.5567 0.049 Uiso 1 1 calc R . . 
C41 C 0.1333(3) 1.5313(9) 0.5628(4) 0.038(2) Uani 1 1 d . . . 
H41 H 0.1158 1.4726 0.5482 0.046 Uiso 1 1 calc R . . 
C42 C 0.1692(2) 1.4972(9) 0.5789(4) 0.0294(19) Uani 1 1 d . . . 
H42 H 0.1763 1.4146 0.5761 0.035 Uiso 1 1 calc R . . 
C43 C 0.4042(2) 1.3578(7) 0.7456(4) 0.0292(19) Uani 1 1 d . . . 
C44 C 0.4333(2) 1.3774(9) 0.7037(5) 0.041(2) Uani 1 1 d . . . 
H44 H 0.4297 1.4350 0.6725 0.049 Uiso 1 1 calc R . . 
C45 C 0.4677(3) 1.3135(8) 0.7067(5) 0.044(2) Uani 1 1 d . . . 
H45 H 0.4872 1.3265 0.6777 0.053 Uiso 1 1 calc R . . 
C46 C 0.4726(3) 1.2313(9) 0.7528(5) 0.046(3) Uani 1 1 d . . . 
H46 H 0.4959 1.1874 0.7552 0.055 Uiso 1 1 calc R . . 
C47 C 0.4452(3) 1.2115(9) 0.7948(5) 0.046(3) Uani 1 1 d . . . 
H47 H 0.4496 1.1549 0.8262 0.056 Uiso 1 1 calc R . . 
C48 C 0.4107(3) 1.2734(8) 0.7923(4) 0.037(2) Uani 1 1 d . . . 
H48 H 0.3916 1.2589 0.8218 0.045 Uiso 1 1 calc R . . 
C49 C 0.3544(3) 1.5261(8) 0.8081(4) 0.0288(19) Uani 1 1 d . . . 
C50 C 0.3179(3) 1.5422(9) 0.8335(4) 0.036(2) Uani 1 1 d . . . 
H50 H 0.2965 1.5011 0.8171 0.043 Uiso 1 1 calc R . . 
C51 C 0.3134(3) 1.6172(9) 0.8819(4) 0.036(2) Uani 1 1 d . . . 
H51 H 0.2886 1.6307 0.8981 0.043 Uiso 1 1 calc R . . 
C52 C 0.3456(3) 1.6752(9) 0.9081(4) 0.040(2) Uani 1 1 d . . . 
H52 H 0.3427 1.7261 0.9422 0.047 Uiso 1 1 calc R . . 
C53 C 0.3810(3) 1.6563(10) 0.8832(5) 0.043(2) Uani 1 1 d . . . 
H53 H 0.4026 1.6950 0.9003 0.052 Uiso 1 1 calc R . . 
C54 C 0.3856(3) 1.5829(8) 0.8342(5) 0.036(2) Uani 1 1 d . . . 
H54 H 0.4104 1.5707 0.8178 0.043 Uiso 1 1 calc R . . 
C55 C 0.0036(2) 0.3712(8) 0.8258(4) 0.0253(18) Uani 1 1 d . . . 
C56 C -0.0071(2) 0.3583(8) 0.7648(4) 0.0278(19) Uani 1 1 d . . . 
H56 H -0.0002 0.4149 0.7313 0.033 Uiso 1 1 calc R . . 
C57 C -0.0285(2) 0.2496(8) 0.7583(5) 0.035(2) Uani 1 1 d . . . 
H57 H -0.0395 0.2168 0.7200 0.043 Uiso 1 1 calc R . . 
C58 C -0.0316(2) 0.1969(8) 0.8168(4) 0.035(2) Uani 1 1 d . . . 
H58 H -0.0450 0.1196 0.8266 0.041 Uiso 1 1 calc R . . 
C59 C -0.0122(2) 0.2714(8) 0.8584(4) 0.031(2) Uani 1 1 d . . . 
H59 H -0.0097 0.2564 0.9027 0.037 Uiso 1 1 calc R . . 
C60 C 0.0721(2) 0.1915(7) 0.7396(4) 0.0243(17) Uani 1 1 d . . . 
C61 C 0.0833(2) 0.2115(7) 0.8010(4) 0.0251(17) Uani 1 1 d . . . 
H61 H 0.0994 0.2801 0.8156 0.030 Uiso 1 1 calc R . . 
C62 C 0.0670(2) 0.1202(8) 0.8379(4) 0.031(2) Uani 1 1 d . . . 
H62 H 0.0697 0.1122 0.8827 0.038 Uiso 1 1 calc R . . 
C63 C 0.0458(3) 0.0424(9) 0.7990(4) 0.036(2) Uani 1 1 d . . . 
H63 H 0.0309 -0.0299 0.8122 0.044 Uiso 1 1 calc R . . 
C64 C 0.0493(2) 0.0834(7) 0.7388(4) 0.0300(19) Uani 1 1 d . . . 
H64 H 0.0374 0.0455 0.7024 0.036 Uiso 1 1 calc R . . 
C65 C 0.2706(2) 1.6532(8) 0.6407(4) 0.0292(19) Uani 1 1 d . . . 
C66 C 0.2832(2) 1.6883(7) 0.7011(4) 0.0288(19) Uani 1 1 d . . . 
H66 H 0.2778 1.6449 0.7398 0.035 Uiso 1 1 calc R . . 
C67 C 0.3048(3) 1.7957(9) 0.6939(5) 0.040(2) Uani 1 1 d . . . 
H67 H 0.3178 1.8408 0.7271 0.048 Uiso 1 1 calc R . . 
C68 C 0.3054(3) 1.8275(9) 0.6335(5) 0.043(2) Uani 1 1 d . . . 
H68 H 0.3191 1.8990 0.6165 0.051 Uiso 1 1 calc R . . 
C69 C 0.2845(3) 1.7430(8) 0.5991(5) 0.039(2) Uani 1 1 d . . . 
H69 H 0.2805 1.7447 0.5545 0.047 Uiso 1 1 calc R . . 
C70 C 0.3637(2) 1.5308(8) 0.6774(4) 0.0291(19) Uani 1 1 d . . . 
C71 C 0.3522(2) 1.4991(8) 0.6177(4) 0.031(2) Uani 1 1 d . . . 
H71 H 0.3380 1.4247 0.6054 0.037 Uiso 1 1 calc R . . 
C72 C 0.3642(3) 1.5946(10) 0.5791(4) 0.043(2) Uani 1 1 d . . . 
H72 H 0.3596 1.5990 0.5346 0.051 Uiso 1 1 calc R . . 
C73 C 0.3841(3) 1.6826(9) 0.6143(5) 0.040(2) Uani 1 1 d . . . 
H73 H 0.3954 1.7594 0.5988 0.048 Uiso 1 1 calc R . . 
C74 C 0.3834(2) 1.6448(8) 0.6755(5) 0.034(2) Uani 1 1 d . . . 
H74 H 0.3947 1.6887 0.7107 0.041 Uiso 1 1 calc R . . 
P5 P 0.02200(9) 0.8746(2) 0.53309(14) 0.0498(7) Uani 1 1 d D . . 
F1 F 0.0544(2) 0.8623(7) 0.5831(3) 0.079(2) Uani 1 1 d D . . 
F2 F 0.0512(2) 0.9474(8) 0.4928(4) 0.095(3) Uani 1 1 d . . . 
F3 F 0.0084(3) 0.9976(6) 0.5629(4) 0.091(3) Uani 1 1 d D . . 
F4 F -0.00980(18) 0.8885(5) 0.4820(3) 0.0589(17) Uani 1 1 d D . . 
F5 F -0.0076(2) 0.8006(6) 0.5737(3) 0.073(2) Uani 1 1 d D . . 
F6 F 0.0356(2) 0.7512(6) 0.5033(3) 0.0644(18) Uani 1 1 d D . . 
P6 P 0.23004(17) 0.8981(5) 0.9347(2) 0.0504(13) Uiso 0.60 1 d PD A 1 
F7 F 0.2537(4) 0.8662(13) 0.8735(5) 0.098(2) Uiso 0.60 1 d PD A 1 
F8 F 0.2065(3) 0.9298(11) 0.9932(5) 0.098(2) Uiso 0.60 1 d PD A 1 
F9 F 0.2689(3) 0.9331(12) 0.9660(5) 0.098(2) Uiso 0.60 1 d PD A 1 
F10 F 0.2267(4) 1.0336(9) 0.9105(6) 0.098(2) Uiso 0.60 1 d PD A 1 
F11 F 0.1918(3) 0.8698(12) 0.8995(5) 0.098(2) Uiso 0.60 1 d PD A 1 
F12 F 0.2346(4) 0.7646(9) 0.9543(6) 0.098(2) Uiso 0.60 1 d PD A 1 
P6A P 0.2456(2) 0.9097(7) 0.9372(3) 0.054(2) Uiso 0.40 1 d PD B 2 
F7A F 0.2622(4) 0.8748(15) 0.8745(5) 0.075(2) Uiso 0.40 1 d PD B 2 
F8A F 0.2262(4) 0.9437(13) 1.0011(5) 0.075(2) Uiso 0.40 1 d PD B 2 
F9A F 0.2695(4) 1.0288(11) 0.9417(7) 0.075(2) Uiso 0.40 1 d PD B 2 
F10A F 0.2111(4) 0.9825(13) 0.9045(6) 0.075(2) Uiso 0.40 1 d PD B 2 
F11A F 0.2183(4) 0.7903(11) 0.9349(7) 0.075(2) Uiso 0.40 1 d PD B 2 
F12A F 0.2762(4) 0.8335(12) 0.9715(6) 0.075(2) Uiso 0.40 1 d PD B 2 
O1 O 0.3504(4) 0.1421(12) 0.8899(6) 0.110(4) Uani 1 1 d . . . 
C1S C 0.3719(5) -0.0360(15) 0.8317(11) 0.124(8) Uani 1 1 d . . . 
H1SA H 0.3627 -0.1159 0.8193 0.187 Uiso 1 1 calc R . . 
H1SB H 0.3933 -0.0452 0.8597 0.187 Uiso 1 1 calc R . . 
H1SC H 0.3803 0.0090 0.7960 0.187 Uiso 1 1 calc R . . 
C2S C 0.3419(9) 0.0276(17) 0.8604(11) 0.154(11) Uani 1 1 d . . . 
H2SA H 0.3307 -0.0267 0.8912 0.185 Uiso 1 1 calc R . . 
H2SB H 0.3219 0.0428 0.8299 0.185 Uiso 1 1 calc R . . 
C3S C 0.3188(4) 0.2146(17) 0.9047(9) 0.107(7) Uani 1 1 d . . . 
H3SA H 0.2990 0.1663 0.9254 0.128 Uiso 1 1 calc R . . 
H3SB H 0.3075 0.2507 0.8679 0.128 Uiso 1 1 calc R . . 
C4S C 0.3332(4) 0.3076(12) 0.9442(7) 0.072(4) Uani 1 1 d . . . 
H4SA H 0.3119 0.3562 0.9594 0.108 Uiso 1 1 calc R . . 
H4SB H 0.3510 0.3594 0.9218 0.108 Uiso 1 1 calc R . . 
H4SC H 0.3467 0.2702 0.9782 0.108 Uiso 1 1 calc R . . 
O2S O 0.3953(5) 1.9535(13) 0.5617(7) 0.093(4) Uiso 0.75 1 d P . . 
C5S C 0.3917(7) 1.869(3) 0.4661(12) 0.118(9) Uiso 0.75 1 d P . . 
H5SA H 0.3959 1.8897 0.4235 0.177 Uiso 0.75 1 calc PR . . 
H5SB H 0.3661 1.8349 0.4711 0.177 Uiso 0.75 1 calc PR . . 
H5SC H 0.4109 1.8104 0.4790 0.177 Uiso 0.75 1 calc PR . . 
C6S C 0.3948(7) 1.971(2) 0.5002(11) 0.100(7) Uiso 0.75 1 d P . . 
H6SA H 0.3732 2.0250 0.4903 0.120 Uiso 0.75 1 calc PR . . 
H6SB H 0.4186 2.0132 0.4886 0.120 Uiso 0.75 1 calc PR . . 
C7S C 0.3992(10) 2.051(3) 0.6089(14) 0.136(10) Uiso 0.75 1 d P . . 
H7SA H 0.4212 2.1021 0.5975 0.163 Uiso 0.75 1 calc PR . . 
H7SB H 0.3761 2.1024 0.6067 0.163 Uiso 0.75 1 calc PR . . 
C8S C 0.4036(7) 2.019(2) 0.6638(11) 0.101(7) Uiso 0.75 1 d P . . 
H8SA H 0.4053 2.0915 0.6893 0.152 Uiso 0.75 1 calc PR . . 
H8SB H 0.4272 1.9723 0.6678 0.152 Uiso 0.75 1 calc PR . . 
H8SC H 0.3818 1.9702 0.6767 0.152 Uiso 0.75 1 calc PR . . 
  
loop_ 
 _atom_site_aniso_label 
 _atom_site_aniso_U_11 
 _atom_site_aniso_U_22 
 _atom_site_aniso_U_33 
 _atom_site_aniso_U_23 
 _atom_site_aniso_U_13 
 _atom_site_aniso_U_12 
Au1 0.02291(14) 0.02368(16) 0.03236(18) -0.00206(14) 0.00306(14) -0.00237(12) 
Au2 0.02650(14) 0.01890(14) 0.03170(17) -0.00434(13) 0.00109(14) -0.00364(11) 
Au3 0.02510(14) 0.02078(15) 0.02865(17) -0.00034(13) -0.00274(13) -0.00113(11) 
Au4 0.02113(14) 0.02437(15) 0.0416(2) 0.00002(14) -0.00194(14) -0.00528(12) 
Fe1 0.0225(5) 0.0235(6) 0.0301(7) -0.0016(5) 0.0002(5) -0.0024(5) 
Fe2 0.0238(6) 0.0257(6) 0.0348(7) -0.0006(5) -0.0003(5) -0.0013(5) 
S1 0.0234(9) 0.0236(9) 0.0422(13) 0.0039(10) -0.0020(9) -0.0041(8) 
S2 0.0249(10) 0.0188(10) 0.0384(13) -0.0034(9) -0.0009(9) -0.0050(8) 
S3 0.0340(11) 0.0196(10) 0.0328(11) -0.0006(9) 0.0004(10) -0.0035(8) 
S4 0.0248(9) 0.0203(10) 0.0581(15) -0.0023(11) 0.0018(11) -0.0060(7) 
P1 0.0225(10) 0.0256(12) 0.0308(12) -0.0033(9) 0.0040(9) -0.0001(9) 
P2 0.0220(10) 0.0193(10) 0.0283(11) -0.0029(9) -0.0016(8) -0.0011(8) 
P3 0.0249(10) 0.0238(11) 0.0299(12) 0.0012(9) -0.0034(9) 0.0003(9) 
P4 0.0201(10) 0.0235(11) 0.0372(13) -0.0011(9) 0.0000(9) -0.0037(8) 
N1 0.022(3) 0.017(4) 0.051(5) -0.003(3) 0.001(3) -0.003(3) 
N2 0.023(3) 0.022(4) 0.044(4) -0.002(3) 0.000(3) -0.001(3) 
C1 0.024(4) 0.032(5) 0.025(4) -0.003(3) 0.007(3) 0.001(3) 
C2 0.018(4) 0.019(4) 0.048(5) 0.003(4) 0.001(3) 0.003(3) 
C3 0.022(4) 0.025(4) 0.044(5) -0.001(4) 0.002(4) -0.003(3) 
C4 0.021(4) 0.031(5) 0.067(7) -0.007(5) 0.007(4) 0.002(3) 
C5 0.023(4) 0.023(5) 0.070(7) 0.002(4) -0.006(4) 0.002(4) 
C6 0.034(5) 0.024(4) 0.031(5) -0.001(4) -0.005(4) 0.004(4) 
C7 0.032(5) 0.022(4) 0.038(5) -0.007(4) 0.003(4) 0.005(4) 
C8 0.032(5) 0.031(5) 0.040(5) 0.001(4) -0.006(4) -0.002(4) 
C9 0.066(7) 0.026(5) 0.033(5) 0.001(4) -0.018(5) -0.007(5) 
C10 0.044(6) 0.052(7) 0.051(7) -0.006(6) -0.021(5) -0.003(5) 
C11 0.032(5) 0.082(9) 0.058(8) -0.015(6) -0.020(5) -0.006(5) 
C12 0.035(5) 0.048(6) 0.030(5) -0.004(4) 0.000(4) -0.006(4) 
C13 0.027(4) 0.042(6) 0.023(5) 0.000(4) 0.002(3) -0.003(4) 
C14 0.034(5) 0.051(6) 0.034(5) 0.001(4) 0.004(4) 0.011(5) 
C15 0.039(6) 0.070(8) 0.039(6) 0.000(6) 0.014(5) 0.023(6) 
C16 0.073(8) 0.063(8) 0.043(6) -0.007(6) 0.009(6) 0.030(7) 
C17 0.071(8) 0.038(6) 0.038(6) -0.014(5) -0.001(5) 0.017(5) 
C18 0.050(6) 0.043(6) 0.030(5) -0.009(4) 0.003(4) -0.001(5) 
C19 0.029(4) 0.025(4) 0.020(4) 0.002(3) -0.001(3) -0.001(3) 
C20 0.027(4) 0.026(4) 0.033(5) -0.007(4) -0.005(4) -0.004(3) 
C21 0.025(4) 0.033(5) 0.047(6) 0.005(4) 0.007(4) -0.001(4) 
C22 0.035(5) 0.035(5) 0.035(5) -0.006(4) 0.007(4) 0.004(4) 
C23 0.039(5) 0.040(6) 0.034(5) -0.007(4) 0.003(4) 0.006(4) 
C24 0.029(4) 0.027(5) 0.030(5) -0.016(4) -0.003(4) -0.001(3) 
C25 0.022(4) 0.035(5) 0.032(5) -0.007(4) 0.007(4) 0.001(4) 
C26 0.032(5) 0.029(5) 0.038(5) -0.001(4) 0.005(4) 0.009(4) 
C27 0.045(6) 0.031(5) 0.037(5) 0.005(4) 0.002(4) 0.011(4) 
C28 0.036(5) 0.052(7) 0.033(5) 0.008(4) 0.001(4) 0.015(5) 
C29 0.029(5) 0.050(7) 0.037(5) -0.008(5) 0.001(4) 0.002(4) 
C30 0.034(5) 0.027(5) 0.036(5) 0.002(4) -0.001(4) 0.000(4) 
C31 0.024(4) 0.031(5) 0.032(5) 0.000(4) -0.001(3) -0.004(4) 
C32 0.028(5) 0.048(6) 0.045(6) -0.003(5) 0.004(4) 0.006(4) 
C33 0.042(6) 0.072(8) 0.024(5) 0.011(5) 0.005(4) 0.011(5) 
C34 0.043(6) 0.056(7) 0.039(6) -0.011(5) 0.006(5) 0.000(5) 
C35 0.028(5) 0.042(6) 0.055(7) -0.008(5) 0.002(4) 0.002(4) 
C36 0.033(5) 0.031(5) 0.037(5) 0.001(4) 0.008(4) -0.008(4) 
C37 0.028(4) 0.034(5) 0.022(4) -0.005(4) 0.005(3) 0.004(4) 
C38 0.035(5) 0.028(5) 0.036(5) 0.007(4) 0.006(4) 0.006(4) 
C39 0.035(5) 0.041(6) 0.037(5) 0.006(4) 0.002(4) 0.017(4) 
C40 0.028(5) 0.065(7) 0.029(5) 0.004(5) -0.004(4) 0.014(5) 
C41 0.028(5) 0.049(6) 0.036(5) -0.001(4) -0.001(4) -0.008(4) 
C42 0.026(4) 0.039(5) 0.023(5) -0.001(4) -0.001(3) 0.000(4) 
C43 0.026(4) 0.021(4) 0.041(5) -0.011(4) -0.004(4) -0.001(3) 
C44 0.025(4) 0.050(6) 0.048(6) 0.004(5) 0.004(4) 0.003(4) 
C45 0.032(5) 0.038(5) 0.063(7) 0.003(5) 0.012(5) 0.009(4) 
C46 0.027(5) 0.042(6) 0.068(7) 0.003(5) -0.014(5) 0.013(4) 
C47 0.046(6) 0.040(6) 0.054(7) 0.003(5) -0.017(5) 0.008(5) 
C48 0.035(5) 0.036(5) 0.040(6) 0.007(4) -0.003(4) 0.002(4) 
C49 0.037(5) 0.022(4) 0.028(5) 0.005(4) 0.004(4) 0.004(4) 
C50 0.031(5) 0.043(6) 0.033(5) 0.004(4) -0.010(4) -0.005(4) 
C51 0.034(5) 0.038(6) 0.035(5) 0.003(4) 0.011(4) 0.011(4) 
C52 0.054(6) 0.032(5) 0.033(5) 0.001(4) 0.003(5) 0.010(5) 
C53 0.042(6) 0.041(6) 0.047(6) -0.012(5) -0.013(5) -0.003(5) 
C54 0.029(5) 0.031(5) 0.048(6) 0.001(4) -0.007(4) -0.005(4) 
C55 0.017(4) 0.030(5) 0.029(5) -0.010(4) 0.005(3) 0.000(3) 
C56 0.019(4) 0.030(5) 0.034(5) -0.002(4) -0.001(3) 0.002(3) 
C57 0.018(4) 0.037(5) 0.051(6) -0.013(5) -0.006(4) 0.002(4) 
C58 0.019(4) 0.032(5) 0.052(6) -0.006(4) 0.006(4) -0.005(4) 
C59 0.025(4) 0.031(5) 0.038(5) -0.006(4) 0.009(4) -0.006(4) 
C60 0.020(3) 0.022(4) 0.032(5) -0.006(3) 0.000(3) 0.004(3) 
C61 0.022(4) 0.023(4) 0.030(5) -0.005(3) 0.005(3) 0.005(3) 
C62 0.030(4) 0.034(5) 0.029(5) 0.006(4) -0.008(4) 0.005(4) 
C63 0.030(5) 0.037(5) 0.041(6) 0.006(4) 0.007(4) -0.003(4) 
C64 0.024(4) 0.023(4) 0.042(5) -0.001(4) -0.004(4) 0.002(3) 
C65 0.021(4) 0.021(4) 0.045(5) 0.004(4) -0.002(4) 0.007(3) 
C66 0.024(4) 0.024(4) 0.039(5) -0.008(4) 0.004(4) 0.003(3) 
C67 0.028(4) 0.033(5) 0.058(7) -0.019(5) 0.001(4) -0.004(4) 
C68 0.027(5) 0.027(5) 0.074(8) 0.005(5) -0.004(5) -0.001(4) 
C69 0.032(5) 0.029(5) 0.057(6) 0.011(5) -0.010(4) 0.001(4) 
C70 0.020(4) 0.027(5) 0.040(5) -0.006(4) -0.005(4) -0.001(3) 
C71 0.027(4) 0.031(5) 0.034(5) -0.003(4) 0.009(4) -0.003(4) 
C72 0.046(6) 0.057(7) 0.025(5) -0.012(4) 0.008(4) 0.006(5) 
C73 0.032(5) 0.035(6) 0.054(7) 0.003(5) 0.015(4) -0.001(4) 
C74 0.024(4) 0.029(5) 0.049(6) -0.001(4) -0.003(4) -0.002(4) 
P5 0.0579(18) 0.0307(14) 0.0608(19) 0.0001(13) -0.0254(15) -0.0061(13) 
F1 0.093(6) 0.061(5) 0.082(5) -0.011(4) -0.051(4) 0.012(4) 
F2 0.083(6) 0.082(6) 0.121(7) 0.041(5) -0.039(5) -0.030(5) 
F3 0.109(7) 0.041(4) 0.122(7) -0.033(4) -0.054(5) 0.021(4) 
F4 0.053(4) 0.052(4) 0.072(4) -0.003(3) -0.030(3) 0.003(3) 
F5 0.086(6) 0.057(5) 0.077(5) 0.010(4) -0.002(4) -0.003(4) 
F6 0.061(4) 0.058(4) 0.075(4) -0.007(3) -0.026(4) 0.015(3) 
O1 0.114(10) 0.100(9) 0.117(10) 0.010(8) 0.023(8) 0.007(8) 
C1S 0.074(11) 0.064(11) 0.23(2) 0.059(13) 0.041(13) -0.007(9) 
C2S 0.27(3) 0.058(12) 0.139(18) -0.011(12) 0.05(2) 0.026(15) 
C3S 0.058(9) 0.121(16) 0.142(16) -0.064(13) -0.017(10) 0.017(9) 
C4S 0.071(9) 0.062(9) 0.082(10) 0.011(7) 0.019(8) 0.005(7) 
  
_geom_special_details 
; 
 All esds (except the esd in the dihedral angle between two l.s. planes) 
 are estimated using the full covariance matrix.  The cell esds are taken 
 into account individually in the estimation of esds in distances, angles 
 and torsion angles; correlations between esds in cell parameters are only 
 used when they are defined by crystal symmetry.  An approximate (isotropic) 
 treatment of cell esds is used for estimating esds involving l.s. planes. 
; 
  
loop_ 
 _geom_bond_atom_site_label_1 
 _geom_bond_atom_site_label_2 
 _geom_bond_distance 
 _geom_bond_site_symmetry_2 
 _geom_bond_publ_flag 
Au1 P1 2.268(2) . ? 
Au1 S1 2.324(2) . ? 
Au1 Au2 3.0072(4) . ? 
Au2 P2 2.273(2) . ? 
Au2 S2 2.323(2) . ? 
Au3 P3 2.268(2) . ? 
Au3 S3 2.336(2) . ? 
Au3 Au4 3.0368(4) . ? 
Au4 P4 2.267(2) . ? 
Au4 S4 2.3220(19) . ? 
Fe1 C55 2.035(8) . ? 
Fe1 C63 2.038(10) . ? 
Fe1 C60 2.042(8) . ? 
Fe1 C56 2.050(8) . ? 
Fe1 C59 2.054(9) . ? 
Fe1 C61 2.054(8) . ? 
Fe1 C58 2.056(8) . ? 
Fe1 C57 2.057(8) . ? 
Fe1 C64 2.058(9) . ? 
Fe1 C62 2.060(8) . ? 
Fe2 C70 2.028(9) . ? 
Fe2 C65 2.035(8) . ? 
Fe2 C68 2.037(9) . ? 
Fe2 C67 2.039(9) . ? 
Fe2 C72 2.041(9) . ? 
Fe2 C74 2.049(9) . ? 
Fe2 C69 2.053(9) . ? 
Fe2 C66 2.053(8) . ? 
Fe2 C71 2.054(9) . ? 
Fe2 C73 2.066(9) . ? 
S1 C1 1.733(8) . ? 
S2 C1 1.743(9) . ? 
S3 C6 1.727(9) . ? 
S4 C6 1.739(9) . ? 
P1 C55 1.807(8) . ? 
P1 C13 1.810(9) . ? 
P1 C7 1.832(9) . ? 
P2 C60 1.802(8) . ? 
P2 C25 1.819(9) . ? 
P2 C19 1.840(8) . ? 
P3 C65 1.778(9) . ? 
P3 C37 1.811(9) . ? 
P3 C31 1.819(9) . ? 
P4 C70 1.792(9) . ? 
P4 C43 1.800(8) . ? 
P4 C49 1.822(9) . ? 
N1 C1 1.307(10) . ? 
N1 C5 1.466(10) . ? 
N1 C2 1.499(10) . ? 
N2 C6 1.325(11) . ? 
N2 C4 1.456(11) . ? 
N2 C3 1.476(10) . ? 
C2 C3 1.498(11) . ? 
C2 H2A 0.9900 . ? 
C2 H2B 0.9900 . ? 
C3 H3A 0.9900 . ? 
C3 H3B 0.9900 . ? 
C4 C5 1.526(12) . ? 
C4 H4A 0.9900 . ? 
C4 H4B 0.9900 . ? 
C5 H5A 0.9900 . ? 
C5 H5B 0.9900 . ? 
C7 C12 1.366(12) . ? 
C7 C8 1.385(13) . ? 
C8 C9 1.389(13) . ? 
C8 H8 0.9500 . ? 
C9 C10 1.363(14) . ? 
C9 H9 0.9500 . ? 
C10 C11 1.380(16) . ? 
C10 H10 0.9500 . ? 
C11 C12 1.379(14) . ? 
C11 H11 0.9500 . ? 
C12 H12 0.9500 . ? 
C13 C14 1.375(13) . ? 
C13 C18 1.382(13) . ? 
C14 C15 1.395(13) . ? 
C14 H14 0.9500 . ? 
C15 C16 1.356(17) . ? 
C15 H15 0.9500 . ? 
C16 C17 1.439(17) . ? 
C16 H16 0.9500 . ? 
C17 C18 1.378(13) . ? 
C17 H17 0.9500 . ? 
C18 H18 0.9500 . ? 
C19 C20 1.369(11) . ? 
C19 C24 1.387(11) . ? 
C20 C21 1.396(12) . ? 
C20 H20 0.9500 . ? 
C21 C22 1.357(13) . ? 
C21 H21 0.9500 . ? 
C22 C23 1.374(13) . ? 
C22 H22 0.9500 . ? 
C23 C24 1.383(12) . ? 
C23 H23 0.9500 . ? 
C24 H24 0.9500 . ? 
C25 C30 1.366(12) . ? 
C25 C26 1.396(12) . ? 
C26 C27 1.402(13) . ? 
C26 H26 0.9500 . ? 
C27 C28 1.390(14) . ? 
C27 H27 0.9500 . ? 
C28 C29 1.379(14) . ? 
C28 H28 0.9500 . ? 
C29 C30 1.393(13) . ? 
C29 H29 0.9500 . ? 
C30 H30 0.9500 . ? 
C31 C32 1.371(13) . ? 
C31 C36 1.385(13) . ? 
C32 C33 1.393(14) . ? 
C32 H32 0.9500 . ? 
C33 C34 1.412(14) . ? 
C33 H33 0.9500 . ? 
C34 C35 1.392(15) . ? 
C34 H34 0.9500 . ? 
C35 C36 1.407(13) . ? 
C35 H35 0.9500 . ? 
C36 H36 0.9500 . ? 
C37 C38 1.390(12) . ? 
C37 C42 1.398(12) . ? 
C38 C39 1.399(12) . ? 
C38 H38 0.9500 . ? 
C39 C40 1.403(15) . ? 
C39 H39 0.9500 . ? 
C40 C41 1.388(14) . ? 
C40 H40 0.9500 . ? 
C41 C42 1.360(12) . ? 
C41 H41 0.9500 . ? 
C42 H42 0.9500 . ? 
C43 C44 1.395(12) . ? 
C43 C48 1.412(12) . ? 
C44 C45 1.397(12) . ? 
C44 H44 0.9500 . ? 
C45 C46 1.379(14) . ? 
C45 H45 0.9500 . ? 
C46 C47 1.355(15) . ? 
C46 H46 0.9500 . ? 
C47 C48 1.390(13) . ? 
C47 H47 0.9500 . ? 
C48 H48 0.9500 . ? 
C49 C54 1.387(12) . ? 
C49 C50 1.408(12) . ? 
C50 C51 1.365(13) . ? 
C50 H50 0.9500 . ? 
C51 C52 1.422(14) . ? 
C51 H51 0.9500 . ? 
C52 C53 1.370(14) . ? 
C52 H52 0.9500 . ? 
C53 C54 1.367(14) . ? 
C53 H53 0.9500 . ? 
C54 H54 0.9500 . ? 
C55 C56 1.410(12) . ? 
C55 C59 1.433(12) . ? 
C56 C57 1.426(12) . ? 
C56 H56 1.0000 . ? 
C57 C58 1.424(14) . ? 
C57 H57 1.0000 . ? 
C58 C59 1.410(13) . ? 
C58 H58 1.0000 . ? 
C59 H59 1.0000 . ? 
C60 C61 1.432(12) . ? 
C60 C64 1.438(11) . ? 
C61 C62 1.421(12) . ? 
C61 H61 1.0000 . ? 
C62 C63 1.426(13) . ? 
C62 H62 1.0000 . ? 
C63 C64 1.413(13) . ? 
C63 H63 1.0000 . ? 
C64 H64 1.0000 . ? 
C65 C69 1.442(13) . ? 
C65 C66 1.462(13) . ? 
C66 C67 1.420(12) . ? 
C66 H66 1.0000 . ? 
C67 C68 1.383(15) . ? 
C67 H67 1.0000 . ? 
C68 C69 1.409(14) . ? 
C68 H68 1.0000 . ? 
C69 H69 1.0000 . ? 
C70 C71 1.426(12) . ? 
C70 C74 1.440(12) . ? 
C71 C72 1.424(14) . ? 
C71 H71 1.0000 . ? 
C72 C73 1.431(14) . ? 
C72 H72 1.0000 . ? 
C73 C74 1.419(14) . ? 
C73 H73 1.0000 . ? 
C74 H74 1.0000 . ? 
P5 F2 1.580(9) . ? 
P5 F3 1.588(7) . ? 
P5 F1 1.590(6) . ? 
P5 F6 1.593(7) . ? 
P5 F4 1.595(6) . ? 
P5 F5 1.597(7) . ? 
P6 F12 1.550(10) . ? 
P6 F8 1.574(10) . ? 
P6 F9 1.576(10) . ? 
P6 F11 1.582(10) . ? 
P6 F10 1.599(10) . ? 
P6 F7 1.629(10) . ? 
P6A F7A 1.554(11) . ? 
P6A F12A 1.562(11) . ? 
P6A F9A 1.565(11) . ? 
P6A F8A 1.616(11) . ? 
P6A F10A 1.622(11) . ? 
P6A F11A 1.635(11) . ? 
O1 C3S 1.407(18) . ? 
O1 C2S 1.46(2) . ? 
C1S C2S 1.41(3) . ? 
C1S H1SA 0.9800 . ? 
C1S H1SB 0.9800 . ? 
C1S H1SC 0.9800 . ? 
C2S H2SA 0.9900 . ? 
C2S H2SB 0.9900 . ? 
C3S C4S 1.44(2) . ? 
C3S H3SA 0.9900 . ? 
C3S H3SB 0.9900 . ? 
C4S H4SA 0.9800 . ? 
C4S H4SB 0.9800 . ? 
C4S H4SC 0.9800 . ? 
O2S C6S 1.38(2) . ? 
O2S C7S 1.51(3) . ? 
C5S C6S 1.36(3) . ? 
C5S H5SA 0.9800 . ? 
C5S H5SB 0.9800 . ? 
C5S H5SC 0.9800 . ? 
C6S H6SA 0.9900 . ? 
C6S H6SB 0.9900 . ? 
C7S C8S 1.28(3) . ? 
C7S H7SA 0.9900 . ? 
C7S H7SB 0.9900 . ? 
C8S H8SA 0.9800 . ? 
C8S H8SB 0.9800 . ? 
C8S H8SC 0.9800 . ? 
  
loop_ 
 _geom_angle_atom_site_label_1 
 _geom_angle_atom_site_label_2 
 _geom_angle_atom_site_label_3 
 _geom_angle 
 _geom_angle_site_symmetry_1 
 _geom_angle_site_symmetry_3 
 _geom_angle_publ_flag 
P1 Au1 S1 168.16(8) . . ? 
P1 Au1 Au2 109.39(6) . . ? 
S1 Au1 Au2 80.39(5) . . ? 
P2 Au2 S2 171.72(8) . . ? 
P2 Au2 Au1 107.23(5) . . ? 
S2 Au2 Au1 79.55(5) . . ? 
P3 Au3 S3 170.40(8) . . ? 
P3 Au3 Au4 105.34(6) . . ? 
S3 Au3 Au4 82.42(5) . . ? 
P4 Au4 S4 167.05(8) . . ? 
P4 Au4 Au3 113.36(6) . . ? 
S4 Au4 Au3 78.91(5) . . ? 
C55 Fe1 C63 154.9(4) . . ? 
C55 Fe1 C60 127.3(3) . . ? 
C63 Fe1 C60 68.7(3) . . ? 
C55 Fe1 C56 40.4(3) . . ? 
C63 Fe1 C56 160.8(4) . . ? 
C60 Fe1 C56 111.2(3) . . ? 
C55 Fe1 C59 41.0(3) . . ? 
C63 Fe1 C59 118.0(4) . . ? 
C60 Fe1 C59 163.2(3) . . ? 
C56 Fe1 C59 68.0(4) . . ? 
C55 Fe1 C61 110.0(3) . . ? 
C63 Fe1 C61 68.0(3) . . ? 
C60 Fe1 C61 40.9(3) . . ? 
C56 Fe1 C61 125.4(3) . . ? 
C59 Fe1 C61 124.8(3) . . ? 
C55 Fe1 C58 68.4(3) . . ? 
C63 Fe1 C58 104.1(4) . . ? 
C60 Fe1 C58 156.4(3) . . ? 
C56 Fe1 C58 67.9(4) . . ? 
C59 Fe1 C58 40.1(3) . . ? 
C61 Fe1 C58 159.0(4) . . ? 
C55 Fe1 C57 68.6(3) . . ? 
C63 Fe1 C57 122.1(4) . . ? 
C60 Fe1 C57 123.0(4) . . ? 
C56 Fe1 C57 40.6(3) . . ? 
C59 Fe1 C57 68.1(4) . . ? 
C61 Fe1 C57 160.1(4) . . ? 
C58 Fe1 C57 40.5(4) . . ? 
C55 Fe1 C64 164.2(4) . . ? 
C63 Fe1 C64 40.4(4) . . ? 
C60 Fe1 C64 41.1(3) . . ? 
C56 Fe1 C64 126.8(3) . . ? 
C59 Fe1 C64 153.1(3) . . ? 
C61 Fe1 C64 68.3(3) . . ? 
C58 Fe1 C64 119.1(4) . . ? 
C57 Fe1 C64 107.4(4) . . ? 
C55 Fe1 C62 121.1(4) . . ? 
C63 Fe1 C62 40.7(4) . . ? 
C60 Fe1 C62 69.0(3) . . ? 
C56 Fe1 C62 158.4(4) . . ? 
C59 Fe1 C62 105.4(4) . . ? 
C61 Fe1 C62 40.4(3) . . ? 
C58 Fe1 C62 121.1(4) . . ? 
C57 Fe1 C62 157.9(4) . . ? 
C64 Fe1 C62 68.5(4) . . ? 
C70 Fe2 C65 126.3(3) . . ? 
C70 Fe2 C68 158.1(4) . . ? 
C65 Fe2 C68 68.4(4) . . ? 
C70 Fe2 C67 124.9(4) . . ? 
C65 Fe2 C67 69.0(4) . . ? 
C68 Fe2 C67 39.7(4) . . ? 
C70 Fe2 C72 68.5(4) . . ? 
C65 Fe2 C72 124.7(4) . . ? 
C68 Fe2 C72 119.1(4) . . ? 
C67 Fe2 C72 153.4(4) . . ? 
C70 Fe2 C74 41.4(3) . . ? 
C65 Fe2 C74 160.9(4) . . ? 
C68 Fe2 C74 119.4(4) . . ? 
C67 Fe2 C74 105.2(4) . . ? 
C72 Fe2 C74 68.7(4) . . ? 
C70 Fe2 C69 161.4(4) . . ? 
C65 Fe2 C69 41.3(4) . . ? 
C68 Fe2 C69 40.3(4) . . ? 
C67 Fe2 C69 68.1(4) . . ? 
C72 Fe2 C69 105.9(4) . . ? 
C74 Fe2 C69 155.0(4) . . ? 
C70 Fe2 C66 110.7(4) . . ? 
C65 Fe2 C66 41.9(4) . . ? 
C68 Fe2 C66 68.0(4) . . ? 
C67 Fe2 C66 40.6(3) . . ? 
C72 Fe2 C66 164.0(4) . . ? 
C74 Fe2 C66 122.0(4) . . ? 
C69 Fe2 C66 69.5(4) . . ? 
C70 Fe2 C71 40.9(3) . . ? 
C65 Fe2 C71 110.9(4) . . ? 
C68 Fe2 C71 156.7(4) . . ? 
C67 Fe2 C71 163.4(4) . . ? 
C72 Fe2 C71 40.7(4) . . ? 
C74 Fe2 C71 69.3(4) . . ? 
C69 Fe2 C71 123.5(4) . . ? 
C66 Fe2 C71 128.2(3) . . ? 
C70 Fe2 C73 68.3(4) . . ? 
C65 Fe2 C73 158.6(4) . . ? 
C68 Fe2 C73 103.3(4) . . ? 
C67 Fe2 C73 118.0(4) . . ? 
C72 Fe2 C73 40.8(4) . . ? 
C74 Fe2 C73 40.3(4) . . ? 
C69 Fe2 C73 119.8(4) . . ? 
C66 Fe2 C73 155.0(4) . . ? 
C71 Fe2 C73 68.6(4) . . ? 
C1 S1 Au1 100.7(3) . . ? 
C1 S2 Au2 105.9(3) . . ? 
C6 S3 Au3 98.9(3) . . ? 
C6 S4 Au4 109.1(3) . . ? 
C55 P1 C13 107.5(4) . . ? 
C55 P1 C7 108.0(4) . . ? 
C13 P1 C7 105.4(4) . . ? 
C55 P1 Au1 114.9(3) . . ? 
C13 P1 Au1 109.3(3) . . ? 
C7 P1 Au1 111.1(3) . . ? 
C60 P2 C25 108.3(4) . . ? 
C60 P2 C19 105.4(4) . . ? 
C25 P2 C19 107.9(4) . . ? 
C60 P2 Au2 109.6(3) . . ? 
C25 P2 Au2 114.3(3) . . ? 
C19 P2 Au2 111.0(3) . . ? 
C65 P3 C37 106.8(4) . . ? 
C65 P3 C31 111.6(4) . . ? 
C37 P3 C31 102.2(4) . . ? 
C65 P3 Au3 112.9(3) . . ? 
C37 P3 Au3 110.5(3) . . ? 
C31 P3 Au3 112.1(3) . . ? 
C70 P4 C43 103.7(4) . . ? 
C70 P4 C49 107.5(4) . . ? 
C43 P4 C49 106.7(4) . . ? 
C70 P4 Au4 114.3(3) . . ? 
C43 P4 Au4 110.2(3) . . ? 
C49 P4 Au4 113.8(3) . . ? 
C1 N1 C5 122.3(7) . . ? 
C1 N1 C2 123.8(7) . . ? 
C5 N1 C2 113.8(6) . . ? 
C6 N2 C4 121.3(7) . . ? 
C6 N2 C3 124.3(7) . . ? 
C4 N2 C3 114.3(6) . . ? 
N1 C1 S1 118.9(6) . . ? 
N1 C1 S2 117.2(6) . . ? 
S1 C1 S2 123.9(5) . . ? 
C3 C2 N1 111.1(7) . . ? 
C3 C2 H2A 109.4 . . ? 
N1 C2 H2A 109.4 . . ? 
C3 C2 H2B 109.4 . . ? 
N1 C2 H2B 109.4 . . ? 
H2A C2 H2B 108.0 . . ? 
N2 C3 C2 111.2(7) . . ? 
N2 C3 H3A 109.4 . . ? 
C2 C3 H3A 109.4 . . ? 
N2 C3 H3B 109.4 . . ? 
C2 C3 H3B 109.4 . . ? 
H3A C3 H3B 108.0 . . ? 
N2 C4 C5 112.2(8) . . ? 
N2 C4 H4A 109.2 . . ? 
C5 C4 H4A 109.2 . . ? 
N2 C4 H4B 109.2 . . ? 
C5 C4 H4B 109.2 . . ? 
H4A C4 H4B 107.9 . . ? 
N1 C5 C4 111.5(7) . . ? 
N1 C5 H5A 109.3 . . ? 
C4 C5 H5A 109.3 . . ? 
N1 C5 H5B 109.3 . . ? 
C4 C5 H5B 109.3 . . ? 
H5A C5 H5B 108.0 . . ? 
N2 C6 S3 120.1(7) . . ? 
N2 C6 S4 115.3(6) . . ? 
S3 C6 S4 124.6(5) . . ? 
C12 C7 C8 120.9(9) . . ? 
C12 C7 P1 119.3(7) . . ? 
C8 C7 P1 119.8(7) . . ? 
C7 C8 C9 118.2(9) . . ? 
C7 C8 H8 120.9 . . ? 
C9 C8 H8 120.9 . . ? 
C10 C9 C8 121.0(10) . . ? 
C10 C9 H9 119.5 . . ? 
C8 C9 H9 119.5 . . ? 
C9 C10 C11 120.2(10) . . ? 
C9 C10 H10 119.9 . . ? 
C11 C10 H10 119.9 . . ? 
C12 C11 C10 119.4(10) . . ? 
C12 C11 H11 120.3 . . ? 
C10 C11 H11 120.3 . . ? 
C7 C12 C11 120.3(10) . . ? 
C7 C12 H12 119.8 . . ? 
C11 C12 H12 119.8 . . ? 
C14 C13 C18 119.1(9) . . ? 
C14 C13 P1 122.8(8) . . ? 
C18 C13 P1 118.1(7) . . ? 
C13 C14 C15 121.0(11) . . ? 
C13 C14 H14 119.5 . . ? 
C15 C14 H14 119.5 . . ? 
C16 C15 C14 118.7(11) . . ? 
C16 C15 H15 120.6 . . ? 
C14 C15 H15 120.6 . . ? 
C15 C16 C17 122.5(10) . . ? 
C15 C16 H16 118.7 . . ? 
C17 C16 H16 118.7 . . ? 
C18 C17 C16 115.7(10) . . ? 
C18 C17 H17 122.2 . . ? 
C16 C17 H17 122.2 . . ? 
C17 C18 C13 122.9(10) . . ? 
C17 C18 H18 118.6 . . ? 
C13 C18 H18 118.6 . . ? 
C20 C19 C24 120.4(8) . . ? 
C20 C19 P2 117.5(6) . . ? 
C24 C19 P2 122.1(6) . . ? 
C19 C20 C21 119.8(8) . . ? 
C19 C20 H20 120.1 . . ? 
C21 C20 H20 120.1 . . ? 
C22 C21 C20 120.0(8) . . ? 
C22 C21 H21 120.0 . . ? 
C20 C21 H21 120.0 . . ? 
C21 C22 C23 120.1(9) . . ? 
C21 C22 H22 119.9 . . ? 
C23 C22 H22 119.9 . . ? 
C22 C23 C24 120.9(9) . . ? 
C22 C23 H23 119.6 . . ? 
C24 C23 H23 119.6 . . ? 
C23 C24 C19 118.7(8) . . ? 
C23 C24 H24 120.6 . . ? 
C19 C24 H24 120.6 . . ? 
C30 C25 C26 119.6(8) . . ? 
C30 C25 P2 123.0(7) . . ? 
C26 C25 P2 117.3(7) . . ? 
C25 C26 C27 120.2(9) . . ? 
C25 C26 H26 119.9 . . ? 
C27 C26 H26 119.9 . . ? 
C28 C27 C26 118.8(9) . . ? 
C28 C27 H27 120.6 . . ? 
C26 C27 H27 120.6 . . ? 
C29 C28 C27 120.9(9) . . ? 
C29 C28 H28 119.5 . . ? 
C27 C28 H28 119.5 . . ? 
C28 C29 C30 119.4(10) . . ? 
C28 C29 H29 120.3 . . ? 
C30 C29 H29 120.3 . . ? 
C25 C30 C29 121.0(9) . . ? 
C25 C30 H30 119.5 . . ? 
C29 C30 H30 119.5 . . ? 
C32 C31 C36 119.6(9) . . ? 
C32 C31 P3 120.1(7) . . ? 
C36 C31 P3 119.9(7) . . ? 
C31 C32 C33 121.7(10) . . ? 
C31 C32 H32 119.2 . . ? 
C33 C32 H32 119.2 . . ? 
C32 C33 C34 118.7(9) . . ? 
C32 C33 H33 120.7 . . ? 
C34 C33 H33 120.7 . . ? 
C35 C34 C33 120.2(9) . . ? 
C35 C34 H34 119.9 . . ? 
C33 C34 H34 119.9 . . ? 
C34 C35 C36 119.2(10) . . ? 
C34 C35 H35 120.4 . . ? 
C36 C35 H35 120.4 . . ? 
C31 C36 C35 120.6(9) . . ? 
C31 C36 H36 119.7 . . ? 
C35 C36 H36 119.7 . . ? 
C38 C37 C42 119.5(8) . . ? 
C38 C37 P3 122.7(7) . . ? 
C42 C37 P3 117.5(7) . . ? 
C37 C38 C39 119.3(9) . . ? 
C37 C38 H38 120.3 . . ? 
C39 C38 H38 120.3 . . ? 
C38 C39 C40 120.4(9) . . ? 
C38 C39 H39 119.8 . . ? 
C40 C39 H39 119.8 . . ? 
C41 C40 C39 119.0(8) . . ? 
C41 C40 H40 120.5 . . ? 
C39 C40 H40 120.5 . . ? 
C42 C41 C40 120.8(9) . . ? 
C42 C41 H41 119.6 . . ? 
C40 C41 H41 119.6 . . ? 
C41 C42 C37 121.0(9) . . ? 
C41 C42 H42 119.5 . . ? 
C37 C42 H42 119.5 . . ? 
C44 C43 C48 118.2(8) . . ? 
C44 C43 P4 122.5(7) . . ? 
C48 C43 P4 119.2(7) . . ? 
C43 C44 C45 121.1(9) . . ? 
C43 C44 H44 119.5 . . ? 
C45 C44 H44 119.5 . . ? 
C46 C45 C44 118.7(9) . . ? 
C46 C45 H45 120.7 . . ? 
C44 C45 H45 120.7 . . ? 
C47 C46 C45 121.7(9) . . ? 
C47 C46 H46 119.2 . . ? 
C45 C46 H46 119.2 . . ? 
C46 C47 C48 120.6(10) . . ? 
C46 C47 H47 119.7 . . ? 
C48 C47 H47 119.7 . . ? 
C47 C48 C43 119.7(9) . . ? 
C47 C48 H48 120.1 . . ? 
C43 C48 H48 120.1 . . ? 
C54 C49 C50 119.4(9) . . ? 
C54 C49 P4 122.3(7) . . ? 
C50 C49 P4 118.3(7) . . ? 
C51 C50 C49 119.7(9) . . ? 
C51 C50 H50 120.1 . . ? 
C49 C50 H50 120.1 . . ? 
C50 C51 C52 120.2(9) . . ? 
C50 C51 H51 119.9 . . ? 
C52 C51 H51 119.9 . . ? 
C53 C52 C51 118.9(9) . . ? 
C53 C52 H52 120.5 . . ? 
C51 C52 H52 120.5 . . ? 
C54 C53 C52 121.1(9) . . ? 
C54 C53 H53 119.4 . . ? 
C52 C53 H53 119.4 . . ? 
C53 C54 C49 120.5(9) . . ? 
C53 C54 H54 119.7 . . ? 
C49 C54 H54 119.7 . . ? 
C56 C55 C59 107.5(7) . . ? 
C56 C55 P1 123.5(7) . . ? 
C59 C55 P1 129.0(7) . . ? 
C56 C55 Fe1 70.4(5) . . ? 
C59 C55 Fe1 70.2(5) . . ? 
P1 C55 Fe1 126.0(4) . . ? 
C55 C56 C57 108.7(8) . . ? 
C55 C56 Fe1 69.2(5) . . ? 
C57 C56 Fe1 69.9(5) . . ? 
C55 C56 H56 125.6 . . ? 
C57 C56 H56 125.6 . . ? 
Fe1 C56 H56 125.6 . . ? 
C58 C57 C56 107.2(8) . . ? 
C58 C57 Fe1 69.7(5) . . ? 
C56 C57 Fe1 69.4(5) . . ? 
C58 C57 H57 126.4 . . ? 
C56 C57 H57 126.4 . . ? 
Fe1 C57 H57 126.4 . . ? 
C59 C58 C57 108.5(8) . . ? 
C59 C58 Fe1 69.8(5) . . ? 
C57 C58 Fe1 69.8(5) . . ? 
C59 C58 H58 125.7 . . ? 
C57 C58 H58 125.7 . . ? 
Fe1 C58 H58 125.7 . . ? 
C58 C59 C55 108.0(8) . . ? 
C58 C59 Fe1 70.0(5) . . ? 
C55 C59 Fe1 68.8(5) . . ? 
C58 C59 H59 126.0 . . ? 
C55 C59 H59 126.0 . . ? 
Fe1 C59 H59 126.0 . . ? 
C61 C60 C64 107.0(7) . . ? 
C61 C60 P2 121.8(6) . . ? 
C64 C60 P2 131.1(7) . . ? 
C61 C60 Fe1 70.0(4) . . ? 
C64 C60 Fe1 70.0(5) . . ? 
P2 C60 Fe1 126.2(4) . . ? 
C62 C61 C60 109.0(7) . . ? 
C62 C61 Fe1 70.0(5) . . ? 
C60 C61 Fe1 69.1(4) . . ? 
C62 C61 H61 125.5 . . ? 
C60 C61 H61 125.5 . . ? 
Fe1 C61 H61 125.5 . . ? 
C61 C62 C63 106.9(8) . . ? 
C61 C62 Fe1 69.6(5) . . ? 
C63 C62 Fe1 68.8(5) . . ? 
C61 C62 H62 126.5 . . ? 
C63 C62 H62 126.5 . . ? 
Fe1 C62 H62 126.5 . . ? 
C64 C63 C62 109.3(8) . . ? 
C64 C63 Fe1 70.6(5) . . ? 
C62 C63 Fe1 70.5(5) . . ? 
C64 C63 H63 125.3 . . ? 
C62 C63 H63 125.3 . . ? 
Fe1 C63 H63 125.3 . . ? 
C63 C64 C60 107.7(8) . . ? 
C63 C64 Fe1 69.1(5) . . ? 
C60 C64 Fe1 68.9(5) . . ? 
C63 C64 H64 126.1 . . ? 
C60 C64 H64 126.1 . . ? 
Fe1 C64 H64 126.1 . . ? 
C69 C65 C66 107.4(8) . . ? 
C69 C65 P3 128.9(7) . . ? 
C66 C65 P3 123.6(7) . . ? 
C69 C65 Fe2 70.0(5) . . ? 
C66 C65 Fe2 69.7(4) . . ? 
P3 C65 Fe2 127.7(4) . . ? 
C67 C66 C65 106.3(8) . . ? 
C67 C66 Fe2 69.2(5) . . ? 
C65 C66 Fe2 68.4(5) . . ? 
C67 C66 H66 126.9 . . ? 
C65 C66 H66 126.9 . . ? 
Fe2 C66 H66 126.9 . . ? 
C68 C67 C66 109.3(9) . . ? 
C68 C67 Fe2 70.1(6) . . ? 
C66 C67 Fe2 70.2(5) . . ? 
C68 C67 H67 125.3 . . ? 
C66 C67 H67 125.3 . . ? 
Fe2 C67 H67 125.3 . . ? 
C67 C68 C69 110.2(9) . . ? 
C67 C68 Fe2 70.2(6) . . ? 
C69 C68 Fe2 70.4(5) . . ? 
C67 C68 H68 124.9 . . ? 
C69 C68 H68 124.9 . . ? 
Fe2 C68 H68 124.9 . . ? 
C68 C69 C65 106.8(9) . . ? 
C68 C69 Fe2 69.2(5) . . ? 
C65 C69 Fe2 68.7(5) . . ? 
C68 C69 H69 126.6 . . ? 
C65 C69 H69 126.6 . . ? 
Fe2 C69 H69 126.6 . . ? 
C71 C70 C74 109.0(8) . . ? 
C71 C70 P4 123.4(7) . . ? 
C74 C70 P4 127.3(7) . . ? 
C71 C70 Fe2 70.5(5) . . ? 
C74 C70 Fe2 70.1(5) . . ? 
P4 C70 Fe2 131.1(5) . . ? 
C72 C71 C70 106.9(8) . . ? 
C72 C71 Fe2 69.1(5) . . ? 
C70 C71 Fe2 68.6(5) . . ? 
C72 C71 H71 126.5 . . ? 
C70 C71 H71 126.5 . . ? 
Fe2 C71 H71 126.5 . . ? 
C71 C72 C73 108.8(9) . . ? 
C71 C72 Fe2 70.2(5) . . ? 
C73 C72 Fe2 70.6(5) . . ? 
C71 C72 H72 125.6 . . ? 
C73 C72 H72 125.6 . . ? 
Fe2 C72 H72 125.6 . . ? 
C74 C73 C72 108.2(9) . . ? 
C74 C73 Fe2 69.2(5) . . ? 
C72 C73 Fe2 68.6(5) . . ? 
C74 C73 H73 125.9 . . ? 
C72 C73 H73 125.9 . . ? 
Fe2 C73 H73 125.9 . . ? 
C73 C74 C70 107.1(8) . . ? 
C73 C74 Fe2 70.5(5) . . ? 
C70 C74 Fe2 68.5(5) . . ? 
C73 C74 H74 126.5 . . ? 
C70 C74 H74 126.5 . . ? 
Fe2 C74 H74 126.5 . . ? 
F2 P5 F3 89.6(5) . . ? 
F2 P5 F1 88.6(5) . . ? 
F3 P5 F1 89.9(4) . . ? 
F2 P5 F6 90.5(5) . . ? 
F3 P5 F6 179.9(7) . . ? 
F1 P5 F6 90.1(4) . . ? 
F2 P5 F4 90.1(4) . . ? 
F3 P5 F4 90.2(4) . . ? 
F1 P5 F4 178.7(5) . . ? 
F6 P5 F4 89.8(4) . . ? 
F2 P5 F5 179.7(6) . . ? 
F3 P5 F5 90.7(5) . . ? 
F1 P5 F5 91.5(5) . . ? 
F6 P5 F5 89.2(4) . . ? 
F4 P5 F5 89.8(4) . . ? 
F12 P6 F8 92.1(6) . . ? 
F12 P6 F9 91.3(6) . . ? 
F8 P6 F9 92.0(6) . . ? 
F12 P6 F11 92.0(6) . . ? 
F8 P6 F11 90.4(6) . . ? 
F9 P6 F11 175.8(7) . . ? 
F12 P6 F10 176.3(7) . . ? 
F8 P6 F10 91.7(6) . . ? 
F9 P6 F10 88.9(6) . . ? 
F11 P6 F10 87.6(6) . . ? 
F12 P6 F7 88.5(6) . . ? 
F8 P6 F7 179.0(7) . . ? 
F9 P6 F7 88.8(6) . . ? 
F11 P6 F7 88.7(6) . . ? 
F10 P6 F7 87.8(6) . . ? 
F7A P6A F12A 92.5(7) . . ? 
F7A P6A F9A 93.9(7) . . ? 
F12A P6A F9A 93.3(7) . . ? 
F7A P6A F8A 177.0(9) . . ? 
F12A P6A F8A 89.3(6) . . ? 
F9A P6A F8A 88.4(7) . . ? 
F7A P6A F10A 90.2(7) . . ? 
F12A P6A F10A 175.2(8) . . ? 
F9A P6A F10A 90.4(7) . . ? 
F8A P6A F10A 87.8(6) . . ? 
F7A P6A F11A 89.4(7) . . ? 
F12A P6A F11A 88.8(6) . . ? 
F9A P6A F11A 176.0(8) . . ? 
F8A P6A F11A 88.2(6) . . ? 
F10A P6A F11A 87.3(7) . . ? 
C3S O1 C2S 116.2(17) . . ? 
C2S C1S H1SA 109.5 . . ? 
C2S C1S H1SB 109.5 . . ? 
H1SA C1S H1SB 109.5 . . ? 
C2S C1S H1SC 109.5 . . ? 
H1SA C1S H1SC 109.5 . . ? 
H1SB C1S H1SC 109.5 . . ? 
C1S C2S O1 119(2) . . ? 
C1S C2S H2SA 107.6 . . ? 
O1 C2S H2SA 107.6 . . ? 
C1S C2S H2SB 107.6 . . ? 
O1 C2S H2SB 107.6 . . ? 
H2SA C2S H2SB 107.0 . . ? 
O1 C3S C4S 105.9(13) . . ? 
O1 C3S H3SA 110.6 . . ? 
C4S C3S H3SA 110.6 . . ? 
O1 C3S H3SB 110.6 . . ? 
C4S C3S H3SB 110.6 . . ? 
H3SA C3S H3SB 108.7 . . ? 
C3S C4S H4SA 109.5 . . ? 
C3S C4S H4SB 109.5 . . ? 
H4SA C4S H4SB 109.5 . . ? 
C3S C4S H4SC 109.5 . . ? 
H4SA C4S H4SC 109.5 . . ? 
H4SB C4S H4SC 109.5 . . ? 
C6S O2S C7S 125.9(19) . . ? 
C6S C5S H5SA 109.5 . . ? 
C6S C5S H5SB 109.5 . . ? 
H5SA C5S H5SB 109.5 . . ? 
C6S C5S H5SC 109.5 . . ? 
H5SA C5S H5SC 109.5 . . ? 
H5SB C5S H5SC 109.5 . . ? 
C5S C6S O2S 116(2) . . ? 
C5S C6S H6SA 108.3 . . ? 
O2S C6S H6SA 108.3 . . ? 
C5S C6S H6SB 108.3 . . ? 
O2S C6S H6SB 108.3 . . ? 
H6SA C6S H6SB 107.4 . . ? 
C8S C7S O2S 118(3) . . ? 
C8S C7S H7SA 107.7 . . ? 
O2S C7S H7SA 107.7 . . ? 
C8S C7S H7SB 107.7 . . ? 
O2S C7S H7SB 107.7 . . ? 
H7SA C7S H7SB 107.1 . . ? 
C7S C8S H8SA 109.5 . . ? 
C7S C8S H8SB 109.5 . . ? 
H8SA C8S H8SB 109.5 . . ? 
C7S C8S H8SC 109.5 . . ? 
H8SA C8S H8SC 109.5 . . ? 
H8SB C8S H8SC 109.5 . . ? 
  
loop_ 
 _geom_torsion_atom_site_label_1 
 _geom_torsion_atom_site_label_2 
 _geom_torsion_atom_site_label_3 
 _geom_torsion_atom_site_label_4 
 _geom_torsion 
 _geom_torsion_site_symmetry_1 
 _geom_torsion_site_symmetry_2 
 _geom_torsion_site_symmetry_3 
 _geom_torsion_site_symmetry_4 
 _geom_torsion_publ_flag 
P1 Au1 Au2 P2 57.78(9) . . . . ? 
S1 Au1 Au2 P2 -129.14(8) . . . . ? 
P1 Au1 Au2 S2 -117.31(8) . . . . ? 
S1 Au1 Au2 S2 55.78(8) . . . . ? 
P3 Au3 Au4 P4 54.49(9) . . . . ? 
S3 Au3 Au4 P4 -131.29(8) . . . . ? 
P3 Au3 Au4 S4 -121.19(9) . . . . ? 
S3 Au3 Au4 S4 53.03(9) . . . . ? 
P1 Au1 S1 C1 90.3(5) . . . . ? 
Au2 Au1 S1 C1 -56.1(3) . . . . ? 
Au1 Au2 S2 C1 -47.2(3) . . . . ? 
Au4 Au3 S3 C6 -55.8(3) . . . . ? 
P4 Au4 S4 C6 155.4(5) . . . . ? 
Au3 Au4 S4 C6 -42.6(3) . . . . ? 
S1 Au1 P1 C55 151.9(4) . . . . ? 
Au2 Au1 P1 C55 -63.4(3) . . . . ? 
S1 Au1 P1 C13 31.0(5) . . . . ? 
Au2 Au1 P1 C13 175.6(3) . . . . ? 
S1 Au1 P1 C7 -85.0(5) . . . . ? 
Au2 Au1 P1 C7 59.6(3) . . . . ? 
Au1 Au2 P2 C60 -71.0(3) . . . . ? 
Au1 Au2 P2 C25 50.8(3) . . . . ? 
Au1 Au2 P2 C19 173.0(3) . . . . ? 
Au4 Au3 P3 C65 -68.6(3) . . . . ? 
Au4 Au3 P3 C37 171.8(3) . . . . ? 
Au4 Au3 P3 C31 58.5(3) . . . . ? 
S4 Au4 P4 C70 103.8(5) . . . . ? 
Au3 Au4 P4 C70 -57.0(3) . . . . ? 
S4 Au4 P4 C43 -12.5(6) . . . . ? 
Au3 Au4 P4 C43 -173.2(3) . . . . ? 
S4 Au4 P4 C49 -132.2(5) . . . . ? 
Au3 Au4 P4 C49 67.1(3) . . . . ? 
C5 N1 C1 S1 -175.5(7) . . . . ? 
C2 N1 C1 S1 6.7(11) . . . . ? 
C5 N1 C1 S2 5.0(11) . . . . ? 
C2 N1 C1 S2 -172.8(6) . . . . ? 
Au1 S1 C1 N1 -141.8(6) . . . . ? 
Au1 S1 C1 S2 37.7(5) . . . . ? 
Au2 S2 C1 N1 -163.2(6) . . . . ? 
Au2 S2 C1 S1 17.4(6) . . . . ? 
C1 N1 C2 C3 152.9(8) . . . . ? 
C5 N1 C2 C3 -25.1(10) . . . . ? 
C6 N2 C3 C2 142.4(8) . . . . ? 
C4 N2 C3 C2 -35.2(11) . . . . ? 
N1 C2 C3 N2 61.4(9) . . . . ? 
C6 N2 C4 C5 159.4(8) . . . . ? 
C3 N2 C4 C5 -22.9(12) . . . . ? 
C1 N1 C5 C4 149.7(9) . . . . ? 
C2 N1 C5 C4 -32.2(11) . . . . ? 
N2 C4 C5 N1 59.0(11) . . . . ? 
C4 N2 C6 S3 -175.0(7) . . . . ? 
C3 N2 C6 S3 7.6(12) . . . . ? 
C4 N2 C6 S4 6.3(11) . . . . ? 
C3 N2 C6 S4 -171.1(7) . . . . ? 
Au3 S3 C6 N2 -136.9(7) . . . . ? 
Au3 S3 C6 S4 41.7(6) . . . . ? 
Au4 S4 C6 N2 -170.5(6) . . . . ? 
Au4 S4 C6 S3 10.9(7) . . . . ? 
C55 P1 C7 C12 119.8(8) . . . . ? 
C13 P1 C7 C12 -125.4(8) . . . . ? 
Au1 P1 C7 C12 -7.1(8) . . . . ? 
C55 P1 C7 C8 -59.4(8) . . . . ? 
C13 P1 C7 C8 55.3(8) . . . . ? 
Au1 P1 C7 C8 173.6(6) . . . . ? 
C12 C7 C8 C9 -3.8(13) . . . . ? 
P1 C7 C8 C9 175.5(7) . . . . ? 
C7 C8 C9 C10 1.9(14) . . . . ? 
C8 C9 C10 C11 0.3(16) . . . . ? 
C9 C10 C11 C12 -0.6(17) . . . . ? 
C8 C7 C12 C11 3.5(15) . . . . ? 
P1 C7 C12 C11 -175.8(8) . . . . ? 
C10 C11 C12 C7 -1.2(16) . . . . ? 
C55 P1 C13 C14 16.1(9) . . . . ? 
C7 P1 C13 C14 -99.0(8) . . . . ? 
Au1 P1 C13 C14 141.5(7) . . . . ? 
C55 P1 C13 C18 -162.9(7) . . . . ? 
C7 P1 C13 C18 82.0(8) . . . . ? 
Au1 P1 C13 C18 -37.5(8) . . . . ? 
C18 C13 C14 C15 0.3(14) . . . . ? 
P1 C13 C14 C15 -178.7(8) . . . . ? 
C13 C14 C15 C16 0.4(15) . . . . ? 
C14 C15 C16 C17 -1.3(17) . . . . ? 
C15 C16 C17 C18 1.5(16) . . . . ? 
C16 C17 C18 C13 -0.8(15) . . . . ? 
C14 C13 C18 C17 -0.1(15) . . . . ? 
P1 C13 C18 C17 179.0(8) . . . . ? 
C60 P2 C19 C20 -95.0(7) . . . . ? 
C25 P2 C19 C20 149.5(7) . . . . ? 
Au2 P2 C19 C20 23.6(7) . . . . ? 
C60 P2 C19 C24 83.4(8) . . . . ? 
C25 P2 C19 C24 -32.1(8) . . . . ? 
Au2 P2 C19 C24 -158.0(7) . . . . ? 
C24 C19 C20 C21 0.5(13) . . . . ? 
P2 C19 C20 C21 178.9(7) . . . . ? 
C19 C20 C21 C22 -0.5(14) . . . . ? 
C20 C21 C22 C23 1.3(14) . . . . ? 
C21 C22 C23 C24 -2.0(15) . . . . ? 
C22 C23 C24 C19 1.9(14) . . . . ? 
C20 C19 C24 C23 -1.2(13) . . . . ? 
P2 C19 C24 C23 -179.5(7) . . . . ? 
C60 P2 C25 C30 -43.6(8) . . . . ? 
C19 P2 C25 C30 70.0(8) . . . . ? 
Au2 P2 C25 C30 -166.1(6) . . . . ? 
C60 P2 C25 C26 134.4(7) . . . . ? 
C19 P2 C25 C26 -112.0(7) . . . . ? 
Au2 P2 C25 C26 11.9(7) . . . . ? 
C30 C25 C26 C27 -0.5(13) . . . . ? 
P2 C25 C26 C27 -178.6(7) . . . . ? 
C25 C26 C27 C28 1.1(13) . . . . ? 
C26 C27 C28 C29 -1.2(14) . . . . ? 
C27 C28 C29 C30 0.6(14) . . . . ? 
C26 C25 C30 C29 -0.1(13) . . . . ? 
P2 C25 C30 C29 177.9(7) . . . . ? 
C28 C29 C30 C25 0.0(14) . . . . ? 
C65 P3 C31 C32 -65.6(8) . . . . ? 
C37 P3 C31 C32 48.2(8) . . . . ? 
Au3 P3 C31 C32 166.6(7) . . . . ? 
C65 P3 C31 C36 121.7(7) . . . . ? 
C37 P3 C31 C36 -124.4(7) . . . . ? 
Au3 P3 C31 C36 -6.0(8) . . . . ? 
C36 C31 C32 C33 -0.6(14) . . . . ? 
P3 C31 C32 C33 -173.2(8) . . . . ? 
C31 C32 C33 C34 2.2(15) . . . . ? 
C32 C33 C34 C35 -2.5(15) . . . . ? 
C33 C34 C35 C36 1.1(15) . . . . ? 
C32 C31 C36 C35 -0.8(13) . . . . ? 
P3 C31 C36 C35 171.8(7) . . . . ? 
C34 C35 C36 C31 0.5(14) . . . . ? 
C65 P3 C37 C38 -12.8(9) . . . . ? 
C31 P3 C37 C38 -130.1(7) . . . . ? 
Au3 P3 C37 C38 110.4(7) . . . . ? 
C65 P3 C37 C42 173.3(7) . . . . ? 
C31 P3 C37 C42 56.0(7) . . . . ? 
Au3 P3 C37 C42 -63.5(7) . . . . ? 
C42 C37 C38 C39 -1.5(13) . . . . ? 
P3 C37 C38 C39 -175.3(7) . . . . ? 
C37 C38 C39 C40 2.0(14) . . . . ? 
C38 C39 C40 C41 -1.9(14) . . . . ? 
C39 C40 C41 C42 1.4(14) . . . . ? 
C40 C41 C42 C37 -0.9(14) . . . . ? 
C38 C37 C42 C41 0.9(13) . . . . ? 
P3 C37 C42 C41 175.0(7) . . . . ? 
C70 P4 C43 C44 -3.2(8) . . . . ? 
C49 P4 C43 C44 -116.5(8) . . . . ? 
Au4 P4 C43 C44 119.5(7) . . . . ? 
C70 P4 C43 C48 178.9(7) . . . . ? 
C49 P4 C43 C48 65.6(8) . . . . ? 
Au4 P4 C43 C48 -58.3(7) . . . . ? 
C48 C43 C44 C45 1.3(14) . . . . ? 
P4 C43 C44 C45 -176.6(8) . . . . ? 
C43 C44 C45 C46 -0.8(15) . . . . ? 
C44 C45 C46 C47 -0.1(16) . . . . ? 
C45 C46 C47 C48 0.6(16) . . . . ? 
C46 C47 C48 C43 -0.2(15) . . . . ? 
C44 C43 C48 C47 -0.8(14) . . . . ? 
P4 C43 C48 C47 177.2(7) . . . . ? 
C70 P4 C49 C54 -76.4(8) . . . . ? 
C43 P4 C49 C54 34.2(9) . . . . ? 
Au4 P4 C49 C54 156.0(7) . . . . ? 
C70 P4 C49 C50 102.7(7) . . . . ? 
C43 P4 C49 C50 -146.6(7) . . . . ? 
Au4 P4 C49 C50 -24.9(8) . . . . ? 
C54 C49 C50 C51 2.6(13) . . . . ? 
P4 C49 C50 C51 -176.5(7) . . . . ? 
C49 C50 C51 C52 -2.5(14) . . . . ? 
C50 C51 C52 C53 1.3(14) . . . . ? 
C51 C52 C53 C54 -0.2(15) . . . . ? 
C52 C53 C54 C49 0.4(16) . . . . ? 
C50 C49 C54 C53 -1.6(14) . . . . ? 
P4 C49 C54 C53 177.5(8) . . . . ? 
C13 P1 C55 C56 106.2(7) . . . . ? 
C7 P1 C55 C56 -140.4(7) . . . . ? 
Au1 P1 C55 C56 -15.7(8) . . . . ? 
C13 P1 C55 C59 -72.0(8) . . . . ? 
C7 P1 C55 C59 41.4(9) . . . . ? 
Au1 P1 C55 C59 166.1(7) . . . . ? 
C13 P1 C55 Fe1 -164.8(5) . . . . ? 
C7 P1 C55 Fe1 -51.4(6) . . . . ? 
Au1 P1 C55 Fe1 73.3(6) . . . . ? 
C63 Fe1 C55 C56 -157.8(8) . . . . ? 
C60 Fe1 C55 C56 78.8(6) . . . . ? 
C59 Fe1 C55 C56 -117.9(7) . . . . ? 
C61 Fe1 C55 C56 121.6(5) . . . . ? 
C58 Fe1 C55 C56 -80.8(5) . . . . ? 
C57 Fe1 C55 C56 -37.2(5) . . . . ? 
C64 Fe1 C55 C56 40.8(14) . . . . ? 
C62 Fe1 C55 C56 165.0(5) . . . . ? 
C63 Fe1 C55 C59 -39.9(10) . . . . ? 
C60 Fe1 C55 C59 -163.3(5) . . . . ? 
C56 Fe1 C55 C59 117.9(7) . . . . ? 
C61 Fe1 C55 C59 -120.5(5) . . . . ? 
C58 Fe1 C55 C59 37.1(5) . . . . ? 
C57 Fe1 C55 C59 80.7(6) . . . . ? 
C64 Fe1 C55 C59 158.7(11) . . . . ? 
C62 Fe1 C55 C59 -77.1(6) . . . . ? 
C63 Fe1 C55 P1 84.5(10) . . . . ? 
C60 Fe1 C55 P1 -39.0(7) . . . . ? 
C56 Fe1 C55 P1 -117.7(8) . . . . ? 
C59 Fe1 C55 P1 124.3(8) . . . . ? 
C61 Fe1 C55 P1 3.9(7) . . . . ? 
C58 Fe1 C55 P1 161.4(7) . . . . ? 
C57 Fe1 C55 P1 -154.9(7) . . . . ? 
C64 Fe1 C55 P1 -76.9(14) . . . . ? 
C62 Fe1 C55 P1 47.2(7) . . . . ? 
C59 C55 C56 C57 -1.7(9) . . . . ? 
P1 C55 C56 C57 179.7(6) . . . . ? 
Fe1 C55 C56 C57 58.9(6) . . . . ? 
C59 C55 C56 Fe1 -60.7(6) . . . . ? 
P1 C55 C56 Fe1 120.8(6) . . . . ? 
C63 Fe1 C56 C55 150.8(10) . . . . ? 
C60 Fe1 C56 C55 -123.2(5) . . . . ? 
C59 Fe1 C56 C55 38.7(5) . . . . ? 
C61 Fe1 C56 C55 -79.1(6) . . . . ? 
C58 Fe1 C56 C55 82.2(5) . . . . ? 
C57 Fe1 C56 C55 120.3(7) . . . . ? 
C64 Fe1 C56 C55 -167.2(5) . . . . ? 
C62 Fe1 C56 C55 -37.0(11) . . . . ? 
C55 Fe1 C56 C57 -120.3(7) . . . . ? 
C63 Fe1 C56 C57 30.5(13) . . . . ? 
C60 Fe1 C56 C57 116.5(5) . . . . ? 
C59 Fe1 C56 C57 -81.5(6) . . . . ? 
C61 Fe1 C56 C57 160.6(5) . . . . ? 
C58 Fe1 C56 C57 -38.1(5) . . . . ? 
C64 Fe1 C56 C57 72.5(6) . . . . ? 
C62 Fe1 C56 C57 -157.3(9) . . . . ? 
C55 C56 C57 C58 1.3(9) . . . . ? 
Fe1 C56 C57 C58 59.8(6) . . . . ? 
C55 C56 C57 Fe1 -58.5(6) . . . . ? 
C55 Fe1 C57 C58 -81.4(5) . . . . ? 
C63 Fe1 C57 C58 73.0(6) . . . . ? 
C60 Fe1 C57 C58 157.1(5) . . . . ? 
C56 Fe1 C57 C58 -118.4(7) . . . . ? 
C59 Fe1 C57 C58 -37.1(5) . . . . ? 
C61 Fe1 C57 C58 -171.1(9) . . . . ? 
C64 Fe1 C57 C58 114.7(5) . . . . ? 
C62 Fe1 C57 C58 39.3(12) . . . . ? 
C55 Fe1 C57 C56 36.9(5) . . . . ? 
C63 Fe1 C57 C56 -168.6(5) . . . . ? 
C60 Fe1 C57 C56 -84.5(6) . . . . ? 
C59 Fe1 C57 C56 81.3(5) . . . . ? 
C61 Fe1 C57 C56 -52.8(12) . . . . ? 
C58 Fe1 C57 C56 118.4(7) . . . . ? 
C64 Fe1 C57 C56 -126.9(5) . . . . ? 
C62 Fe1 C57 C56 157.7(9) . . . . ? 
C56 C57 C58 C59 -0.3(10) . . . . ? 
Fe1 C57 C58 C59 59.3(6) . . . . ? 
C56 C57 C58 Fe1 -59.6(6) . . . . ? 
C55 Fe1 C58 C59 -37.9(5) . . . . ? 
C63 Fe1 C58 C59 116.9(6) . . . . ? 
C60 Fe1 C58 C59 -174.2(8) . . . . ? 
C56 Fe1 C58 C59 -81.5(6) . . . . ? 
C61 Fe1 C58 C59 51.9(12) . . . . ? 
C57 Fe1 C58 C59 -119.7(8) . . . . ? 
C64 Fe1 C58 C59 157.5(5) . . . . ? 
C62 Fe1 C58 C59 76.4(6) . . . . ? 
C55 Fe1 C58 C57 81.9(5) . . . . ? 
C63 Fe1 C58 C57 -123.4(5) . . . . ? 
C60 Fe1 C58 C57 -54.4(11) . . . . ? 
C56 Fe1 C58 C57 38.2(5) . . . . ? 
C59 Fe1 C58 C57 119.7(8) . . . . ? 
C61 Fe1 C58 C57 171.6(9) . . . . ? 
C64 Fe1 C58 C57 -82.8(6) . . . . ? 
C62 Fe1 C58 C57 -163.9(5) . . . . ? 
C57 C58 C59 C55 -0.8(10) . . . . ? 
Fe1 C58 C59 C55 58.5(6) . . . . ? 
C57 C58 C59 Fe1 -59.2(6) . . . . ? 
C56 C55 C59 C58 1.5(9) . . . . ? 
P1 C55 C59 C58 180.0(6) . . . . ? 
Fe1 C55 C59 C58 -59.3(6) . . . . ? 
C56 C55 C59 Fe1 60.8(6) . . . . ? 
P1 C55 C59 Fe1 -120.8(7) . . . . ? 
C55 Fe1 C59 C58 119.6(8) . . . . ? 
C63 Fe1 C59 C58 -78.4(6) . . . . ? 
C60 Fe1 C59 C58 171.9(11) . . . . ? 
C56 Fe1 C59 C58 81.4(6) . . . . ? 
C61 Fe1 C59 C58 -159.9(5) . . . . ? 
C57 Fe1 C59 C58 37.4(6) . . . . ? 
C64 Fe1 C59 C58 -47.8(11) . . . . ? 
C62 Fe1 C59 C58 -120.3(6) . . . . ? 
C63 Fe1 C59 C55 162.0(5) . . . . ? 
C60 Fe1 C59 C55 52.3(14) . . . . ? 
C56 Fe1 C59 C55 -38.1(5) . . . . ? 
C61 Fe1 C59 C55 80.5(6) . . . . ? 
C58 Fe1 C59 C55 -119.6(8) . . . . ? 
C57 Fe1 C59 C55 -82.1(5) . . . . ? 
C64 Fe1 C59 C55 -167.4(7) . . . . ? 
C62 Fe1 C59 C55 120.1(5) . . . . ? 
C25 P2 C60 C61 -131.1(6) . . . . ? 
C19 P2 C60 C61 113.7(6) . . . . ? 
Au2 P2 C60 C61 -5.8(7) . . . . ? 
C25 P2 C60 C64 50.7(8) . . . . ? 
C19 P2 C60 C64 -64.5(8) . . . . ? 
Au2 P2 C60 C64 176.0(7) . . . . ? 
C25 P2 C60 Fe1 -43.7(6) . . . . ? 
C19 P2 C60 Fe1 -158.9(5) . . . . ? 
Au2 P2 C60 Fe1 81.6(5) . . . . ? 
C55 Fe1 C60 C61 77.1(6) . . . . ? 
C63 Fe1 C60 C61 -80.5(5) . . . . ? 
C56 Fe1 C60 C61 120.1(5) . . . . ? 
C59 Fe1 C60 C61 36.3(14) . . . . ? 
C58 Fe1 C60 C61 -156.8(8) . . . . ? 
C57 Fe1 C60 C61 164.1(5) . . . . ? 
C64 Fe1 C60 C61 -117.6(7) . . . . ? 
C62 Fe1 C60 C61 -36.7(5) . . . . ? 
C55 Fe1 C60 C64 -165.3(5) . . . . ? 
C63 Fe1 C60 C64 37.1(5) . . . . ? 
C56 Fe1 C60 C64 -122.3(5) . . . . ? 
C59 Fe1 C60 C64 154.0(12) . . . . ? 
C61 Fe1 C60 C64 117.6(7) . . . . ? 
C58 Fe1 C60 C64 -39.1(11) . . . . ? 
C57 Fe1 C60 C64 -78.2(6) . . . . ? 
C62 Fe1 C60 C64 80.9(5) . . . . ? 
C55 Fe1 C60 P2 -38.3(7) . . . . ? 
C63 Fe1 C60 P2 164.1(6) . . . . ? 
C56 Fe1 C60 P2 4.7(6) . . . . ? 
C59 Fe1 C60 P2 -79.1(14) . . . . ? 
C61 Fe1 C60 P2 -115.4(7) . . . . ? 
C58 Fe1 C60 P2 87.8(10) . . . . ? 
C57 Fe1 C60 P2 48.7(7) . . . . ? 
C64 Fe1 C60 P2 126.9(8) . . . . ? 
C62 Fe1 C60 P2 -152.1(6) . . . . ? 
C64 C60 C61 C62 -1.8(9) . . . . ? 
P2 C60 C61 C62 179.6(6) . . . . ? 
Fe1 C60 C61 C62 58.8(6) . . . . ? 
C64 C60 C61 Fe1 -60.6(5) . . . . ? 
P2 C60 C61 Fe1 120.9(6) . . . . ? 
C55 Fe1 C61 C62 115.0(5) . . . . ? 
C63 Fe1 C61 C62 -38.2(5) . . . . ? 
C60 Fe1 C61 C62 -120.6(7) . . . . ? 
C56 Fe1 C61 C62 157.6(5) . . . . ? 
C59 Fe1 C61 C62 71.4(6) . . . . ? 
C58 Fe1 C61 C62 33.3(12) . . . . ? 
C57 Fe1 C61 C62 -162.9(9) . . . . ? 
C64 Fe1 C61 C62 -81.8(6) . . . . ? 
C55 Fe1 C61 C60 -124.4(5) . . . . ? 
C63 Fe1 C61 C60 82.4(5) . . . . ? 
C56 Fe1 C61 C60 -81.8(6) . . . . ? 
C59 Fe1 C61 C60 -168.0(5) . . . . ? 
C58 Fe1 C61 C60 153.9(9) . . . . ? 
C57 Fe1 C61 C60 -42.3(12) . . . . ? 
C64 Fe1 C61 C60 38.8(5) . . . . ? 
C62 Fe1 C61 C60 120.6(7) . . . . ? 
C60 C61 C62 C63 0.7(9) . . . . ? 
Fe1 C61 C62 C63 58.9(6) . . . . ? 
C60 C61 C62 Fe1 -58.2(5) . . . . ? 
C55 Fe1 C62 C61 -84.6(6) . . . . ? 
C63 Fe1 C62 C61 118.6(7) . . . . ? 
C60 Fe1 C62 C61 37.2(5) . . . . ? 
C56 Fe1 C62 C61 -57.5(12) . . . . ? 
C59 Fe1 C62 C61 -126.2(5) . . . . ? 
C58 Fe1 C62 C61 -166.7(5) . . . . ? 
C57 Fe1 C62 C61 164.5(9) . . . . ? 
C64 Fe1 C62 C61 81.4(5) . . . . ? 
C55 Fe1 C62 C63 156.8(5) . . . . ? 
C60 Fe1 C62 C63 -81.4(5) . . . . ? 
C56 Fe1 C62 C63 -176.1(8) . . . . ? 
C59 Fe1 C62 C63 115.2(5) . . . . ? 
C61 Fe1 C62 C63 -118.6(7) . . . . ? 
C58 Fe1 C62 C63 74.7(6) . . . . ? 
C57 Fe1 C62 C63 46.0(12) . . . . ? 
C64 Fe1 C62 C63 -37.2(5) . . . . ? 
C61 C62 C63 C64 0.7(10) . . . . ? 
Fe1 C62 C63 C64 60.1(7) . . . . ? 
C61 C62 C63 Fe1 -59.4(6) . . . . ? 
C55 Fe1 C63 C64 -172.3(7) . . . . ? 
C60 Fe1 C63 C64 -37.7(5) . . . . ? 
C56 Fe1 C63 C64 55.8(12) . . . . ? 
C59 Fe1 C63 C64 159.2(5) . . . . ? 
C61 Fe1 C63 C64 -81.9(5) . . . . ? 
C58 Fe1 C63 C64 118.6(5) . . . . ? 
C57 Fe1 C63 C64 78.8(6) . . . . ? 
C62 Fe1 C63 C64 -119.8(7) . . . . ? 
C55 Fe1 C63 C62 -52.5(10) . . . . ? 
C60 Fe1 C63 C62 82.1(5) . . . . ? 
C56 Fe1 C63 C62 175.6(9) . . . . ? 
C59 Fe1 C63 C62 -81.0(6) . . . . ? 
C61 Fe1 C63 C62 37.9(5) . . . . ? 
C58 Fe1 C63 C62 -121.6(5) . . . . ? 
C57 Fe1 C63 C62 -161.4(5) . . . . ? 
C64 Fe1 C63 C62 119.8(7) . . . . ? 
C62 C63 C64 C60 -1.8(10) . . . . ? 
Fe1 C63 C64 C60 58.2(6) . . . . ? 
C62 C63 C64 Fe1 -60.0(7) . . . . ? 
C61 C60 C64 C63 2.2(9) . . . . ? 
P2 C60 C64 C63 -179.4(6) . . . . ? 
Fe1 C60 C64 C63 -58.3(6) . . . . ? 
C61 C60 C64 Fe1 60.5(5) . . . . ? 
P2 C60 C64 Fe1 -121.1(7) . . . . ? 
C55 Fe1 C64 C63 167.9(11) . . . . ? 
C60 Fe1 C64 C63 119.8(7) . . . . ? 
C56 Fe1 C64 C63 -160.1(5) . . . . ? 
C59 Fe1 C64 C63 -43.9(10) . . . . ? 
C61 Fe1 C64 C63 81.1(6) . . . . ? 
C58 Fe1 C64 C63 -77.0(6) . . . . ? 
C57 Fe1 C64 C63 -119.5(6) . . . . ? 
C62 Fe1 C64 C63 37.5(5) . . . . ? 
C55 Fe1 C64 C60 48.1(14) . . . . ? 
C63 Fe1 C64 C60 -119.8(7) . . . . ? 
C56 Fe1 C64 C60 80.1(6) . . . . ? 
C59 Fe1 C64 C60 -163.7(7) . . . . ? 
C61 Fe1 C64 C60 -38.7(5) . . . . ? 
C58 Fe1 C64 C60 163.2(5) . . . . ? 
C57 Fe1 C64 C60 120.7(5) . . . . ? 
C62 Fe1 C64 C60 -82.3(5) . . . . ? 
C37 P3 C65 C69 -64.0(9) . . . . ? 
C31 P3 C65 C69 46.9(9) . . . . ? 
Au3 P3 C65 C69 174.2(7) . . . . ? 
C37 P3 C65 C66 112.7(7) . . . . ? 
C31 P3 C65 C66 -136.4(7) . . . . ? 
Au3 P3 C65 C66 -9.0(8) . . . . ? 
C37 P3 C65 Fe2 -158.0(6) . . . . ? 
C31 P3 C65 Fe2 -47.1(7) . . . . ? 
Au3 P3 C65 Fe2 80.3(6) . . . . ? 
C70 Fe2 C65 C69 -161.1(6) . . . . ? 
C68 Fe2 C65 C69 37.6(6) . . . . ? 
C67 Fe2 C65 C69 80.3(6) . . . . ? 
C72 Fe2 C65 C69 -73.6(7) . . . . ? 
C74 Fe2 C65 C69 155.6(11) . . . . ? 
C66 Fe2 C65 C69 118.2(8) . . . . ? 
C71 Fe2 C65 C69 -117.4(6) . . . . ? 
C73 Fe2 C65 C69 -32.9(13) . . . . ? 
C70 Fe2 C65 C66 80.7(6) . . . . ? 
C68 Fe2 C65 C66 -80.6(6) . . . . ? 
C67 Fe2 C65 C66 -37.9(5) . . . . ? 
C72 Fe2 C65 C66 168.1(5) . . . . ? 
C74 Fe2 C65 C66 37.4(13) . . . . ? 
C69 Fe2 C65 C66 -118.2(8) . . . . ? 
C71 Fe2 C65 C66 124.4(5) . . . . ? 
C73 Fe2 C65 C66 -151.2(10) . . . . ? 
C70 Fe2 C65 P3 -36.7(8) . . . . ? 
C68 Fe2 C65 P3 162.0(8) . . . . ? 
C67 Fe2 C65 P3 -155.3(8) . . . . ? 
C72 Fe2 C65 P3 50.7(8) . . . . ? 
C74 Fe2 C65 P3 -80.1(13) . . . . ? 
C69 Fe2 C65 P3 124.3(9) . . . . ? 
C66 Fe2 C65 P3 -117.4(8) . . . . ? 
C71 Fe2 C65 P3 6.9(7) . . . . ? 
C73 Fe2 C65 P3 91.4(11) . . . . ? 
C69 C65 C66 C67 -1.1(9) . . . . ? 
P3 C65 C66 C67 -178.5(6) . . . . ? 
Fe2 C65 C66 C67 59.1(6) . . . . ? 
C69 C65 C66 Fe2 -60.2(6) . . . . ? 
P3 C65 C66 Fe2 122.5(6) . . . . ? 
C70 Fe2 C66 C67 120.0(6) . . . . ? 
C65 Fe2 C66 C67 -118.3(8) . . . . ? 
C68 Fe2 C66 C67 -36.5(6) . . . . ? 
C72 Fe2 C66 C67 -156.0(14) . . . . ? 
C74 Fe2 C66 C67 75.3(7) . . . . ? 
C69 Fe2 C66 C67 -79.9(6) . . . . ? 
C71 Fe2 C66 C67 163.0(6) . . . . ? 
C73 Fe2 C66 C67 37.1(11) . . . . ? 
C70 Fe2 C66 C65 -121.7(5) . . . . ? 
C68 Fe2 C66 C65 81.8(6) . . . . ? 
C67 Fe2 C66 C65 118.3(8) . . . . ? 
C72 Fe2 C66 C65 -37.8(16) . . . . ? 
C74 Fe2 C66 C65 -166.5(5) . . . . ? 
C69 Fe2 C66 C65 38.4(5) . . . . ? 
C71 Fe2 C66 C65 -78.7(6) . . . . ? 
C73 Fe2 C66 C65 155.4(8) . . . . ? 
C65 C66 C67 C68 0.8(10) . . . . ? 
Fe2 C66 C67 C68 59.4(7) . . . . ? 
C65 C66 C67 Fe2 -58.5(5) . . . . ? 
C70 Fe2 C67 C68 158.5(5) . . . . ? 
C65 Fe2 C67 C68 -81.2(6) . . . . ? 
C72 Fe2 C67 C68 45.2(11) . . . . ? 
C74 Fe2 C67 C68 117.9(6) . . . . ? 
C69 Fe2 C67 C68 -36.6(6) . . . . ? 
C66 Fe2 C67 C68 -120.3(8) . . . . ? 
C71 Fe2 C67 C68 -174.0(11) . . . . ? 
C73 Fe2 C67 C68 76.5(7) . . . . ? 
C70 Fe2 C67 C66 -81.2(6) . . . . ? 
C65 Fe2 C67 C66 39.1(5) . . . . ? 
C68 Fe2 C67 C66 120.3(8) . . . . ? 
C72 Fe2 C67 C66 165.5(8) . . . . ? 
C74 Fe2 C67 C66 -121.8(6) . . . . ? 
C69 Fe2 C67 C66 83.6(6) . . . . ? 
C71 Fe2 C67 C66 -53.7(15) . . . . ? 
C73 Fe2 C67 C66 -163.2(5) . . . . ? 
C66 C67 C68 C69 -0.2(11) . . . . ? 
Fe2 C67 C68 C69 59.2(7) . . . . ? 
C66 C67 C68 Fe2 -59.5(6) . . . . ? 
C70 Fe2 C68 C67 -53.5(13) . . . . ? 
C65 Fe2 C68 C67 82.6(6) . . . . ? 
C72 Fe2 C68 C67 -158.7(6) . . . . ? 
C74 Fe2 C68 C67 -78.0(6) . . . . ? 
C69 Fe2 C68 C67 121.2(9) . . . . ? 
C66 Fe2 C68 C67 37.3(5) . . . . ? 
C71 Fe2 C68 C67 175.7(8) . . . . ? 
C73 Fe2 C68 C67 -118.1(6) . . . . ? 
C70 Fe2 C68 C69 -174.7(9) . . . . ? 
C65 Fe2 C68 C69 -38.5(6) . . . . ? 
C67 Fe2 C68 C69 -121.2(9) . . . . ? 
C72 Fe2 C68 C69 80.2(7) . . . . ? 
C74 Fe2 C68 C69 160.8(6) . . . . ? 
C66 Fe2 C68 C69 -83.8(6) . . . . ? 
C71 Fe2 C68 C69 54.5(12) . . . . ? 
C73 Fe2 C68 C69 120.8(6) . . . . ? 
C67 C68 C69 C65 -0.5(11) . . . . ? 
Fe2 C68 C69 C65 58.6(6) . . . . ? 
C67 C68 C69 Fe2 -59.1(7) . . . . ? 
C66 C65 C69 C68 1.0(10) . . . . ? 
P3 C65 C69 C68 178.2(7) . . . . ? 
Fe2 C65 C69 C68 -59.0(6) . . . . ? 
C66 C65 C69 Fe2 60.0(5) . . . . ? 
P3 C65 C69 Fe2 -122.9(7) . . . . ? 
C70 Fe2 C69 C68 173.8(11) . . . . ? 
C65 Fe2 C69 C68 118.7(9) . . . . ? 
C67 Fe2 C69 C68 36.1(6) . . . . ? 
C72 Fe2 C69 C68 -116.5(7) . . . . ? 
C74 Fe2 C69 C68 -42.7(13) . . . . ? 
C66 Fe2 C69 C68 79.8(6) . . . . ? 
C71 Fe2 C69 C68 -157.3(6) . . . . ? 
C73 Fe2 C69 C68 -74.5(7) . . . . ? 
C70 Fe2 C69 C65 55.1(14) . . . . ? 
C68 Fe2 C69 C65 -118.7(9) . . . . ? 
C67 Fe2 C69 C65 -82.6(6) . . . . ? 
C72 Fe2 C69 C65 124.9(6) . . . . ? 
C74 Fe2 C69 C65 -161.4(8) . . . . ? 
C66 Fe2 C69 C65 -38.9(5) . . . . ? 
C71 Fe2 C69 C65 84.0(6) . . . . ? 
C73 Fe2 C69 C65 166.8(5) . . . . ? 
C43 P4 C70 C71 94.4(8) . . . . ? 
C49 P4 C70 C71 -152.9(7) . . . . ? 
Au4 P4 C70 C71 -25.6(8) . . . . ? 
C43 P4 C70 C74 -77.6(8) . . . . ? 
C49 P4 C70 C74 35.1(9) . . . . ? 
Au4 P4 C70 C74 162.4(7) . . . . ? 
C43 P4 C70 Fe2 -173.1(5) . . . . ? 
C49 P4 C70 Fe2 -60.4(7) . . . . ? 
Au4 P4 C70 Fe2 66.9(6) . . . . ? 
C65 Fe2 C70 C71 80.2(6) . . . . ? 
C68 Fe2 C70 C71 -152.8(10) . . . . ? 
C67 Fe2 C70 C71 168.4(5) . . . . ? 
C72 Fe2 C70 C71 -37.8(5) . . . . ? 
C74 Fe2 C70 C71 -119.7(7) . . . . ? 
C69 Fe2 C70 C71 38.0(14) . . . . ? 
C66 Fe2 C70 C71 125.0(5) . . . . ? 
C73 Fe2 C70 C71 -81.8(6) . . . . ? 
C65 Fe2 C70 C74 -160.2(5) . . . . ? 
C68 Fe2 C70 C74 -33.2(13) . . . . ? 
C67 Fe2 C70 C74 -71.9(6) . . . . ? 
C72 Fe2 C70 C74 81.8(6) . . . . ? 
C69 Fe2 C70 C74 157.7(11) . . . . ? 
C66 Fe2 C70 C74 -115.4(6) . . . . ? 
C71 Fe2 C70 C74 119.7(7) . . . . ? 
C73 Fe2 C70 C74 37.8(6) . . . . ? 
C65 Fe2 C70 P4 -37.6(8) . . . . ? 
C68 Fe2 C70 P4 89.4(12) . . . . ? 
C67 Fe2 C70 P4 50.6(7) . . . . ? 
C72 Fe2 C70 P4 -155.6(7) . . . . ? 
C74 Fe2 C70 P4 122.6(9) . . . . ? 
C69 Fe2 C70 P4 -79.8(14) . . . . ? 
C66 Fe2 C70 P4 7.2(7) . . . . ? 
C71 Fe2 C70 P4 -117.8(8) . . . . ? 
C73 Fe2 C70 P4 160.4(7) . . . . ? 
C74 C70 C71 C72 -1.1(10) . . . . ? 
P4 C70 C71 C72 -174.3(7) . . . . ? 
Fe2 C70 C71 C72 58.7(6) . . . . ? 
C74 C70 C71 Fe2 -59.8(6) . . . . ? 
P4 C70 C71 Fe2 127.0(7) . . . . ? 
C70 Fe2 C71 C72 -119.0(8) . . . . ? 
C65 Fe2 C71 C72 119.3(6) . . . . ? 
C68 Fe2 C71 C72 35.5(12) . . . . ? 
C67 Fe2 C71 C72 -154.3(12) . . . . ? 
C74 Fe2 C71 C72 -81.1(6) . . . . ? 
C69 Fe2 C71 C72 74.7(7) . . . . ? 
C66 Fe2 C71 C72 163.9(6) . . . . ? 
C73 Fe2 C71 C72 -37.7(6) . . . . ? 
C65 Fe2 C71 C70 -121.7(5) . . . . ? 
C68 Fe2 C71 C70 154.5(9) . . . . ? 
C67 Fe2 C71 C70 -35.3(15) . . . . ? 
C72 Fe2 C71 C70 119.0(8) . . . . ? 
C74 Fe2 C71 C70 37.9(5) . . . . ? 
C69 Fe2 C71 C70 -166.4(5) . . . . ? 
C66 Fe2 C71 C70 -77.2(6) . . . . ? 
C73 Fe2 C71 C70 81.2(6) . . . . ? 
C70 C71 C72 C73 1.9(11) . . . . ? 
Fe2 C71 C72 C73 60.3(7) . . . . ? 
C70 C71 C72 Fe2 -58.4(6) . . . . ? 
C70 Fe2 C72 C71 38.0(5) . . . . ? 
C65 Fe2 C72 C71 -82.0(7) . . . . ? 
C68 Fe2 C72 C71 -164.8(5) . . . . ? 
C67 Fe2 C72 C71 164.0(8) . . . . ? 
C74 Fe2 C72 C71 82.6(6) . . . . ? 
C69 Fe2 C72 C71 -123.2(6) . . . . ? 
C66 Fe2 C72 C71 -52.2(16) . . . . ? 
C73 Fe2 C72 C71 119.3(8) . . . . ? 
C70 Fe2 C72 C73 -81.3(6) . . . . ? 
C65 Fe2 C72 C73 158.6(6) . . . . ? 
C68 Fe2 C72 C73 75.9(7) . . . . ? 
C67 Fe2 C72 C73 44.7(12) . . . . ? 
C74 Fe2 C72 C73 -36.8(6) . . . . ? 
C69 Fe2 C72 C73 117.4(6) . . . . ? 
C66 Fe2 C72 C73 -171.5(12) . . . . ? 
C71 Fe2 C72 C73 -119.3(8) . . . . ? 
C71 C72 C73 C74 -2.0(11) . . . . ? 
Fe2 C72 C73 C74 58.0(6) . . . . ? 
C71 C72 C73 Fe2 -60.0(7) . . . . ? 
C70 Fe2 C73 C74 -38.7(5) . . . . ? 
C65 Fe2 C73 C74 -175.7(9) . . . . ? 
C68 Fe2 C73 C74 120.0(6) . . . . ? 
C67 Fe2 C73 C74 80.4(7) . . . . ? 
C72 Fe2 C73 C74 -120.5(8) . . . . ? 
C69 Fe2 C73 C74 159.9(6) . . . . ? 
C66 Fe2 C73 C74 54.0(11) . . . . ? 
C71 Fe2 C73 C74 -82.9(6) . . . . ? 
C70 Fe2 C73 C72 81.8(6) . . . . ? 
C65 Fe2 C73 C72 -55.2(13) . . . . ? 
C68 Fe2 C73 C72 -119.5(6) . . . . ? 
C67 Fe2 C73 C72 -159.1(6) . . . . ? 
C74 Fe2 C73 C72 120.5(8) . . . . ? 
C69 Fe2 C73 C72 -79.6(7) . . . . ? 
C66 Fe2 C73 C72 174.5(8) . . . . ? 
C71 Fe2 C73 C72 37.7(6) . . . . ? 
C72 C73 C74 C70 1.4(10) . . . . ? 
Fe2 C73 C74 C70 59.0(6) . . . . ? 
C72 C73 C74 Fe2 -57.6(7) . . . . ? 
C71 C70 C74 C73 -0.2(10) . . . . ? 
P4 C70 C74 C73 172.7(7) . . . . ? 
Fe2 C70 C74 C73 -60.2(6) . . . . ? 
C71 C70 C74 Fe2 60.0(6) . . . . ? 
P4 C70 C74 Fe2 -127.0(7) . . . . ? 
C70 Fe2 C74 C73 118.3(8) . . . . ? 
C65 Fe2 C74 C73 175.2(10) . . . . ? 
C68 Fe2 C74 C73 -75.2(7) . . . . ? 
C67 Fe2 C74 C73 -115.5(6) . . . . ? 
C72 Fe2 C74 C73 37.1(6) . . . . ? 
C69 Fe2 C74 C73 -45.0(12) . . . . ? 
C66 Fe2 C74 C73 -156.2(5) . . . . ? 
C71 Fe2 C74 C73 80.9(6) . . . . ? 
C65 Fe2 C74 C70 56.9(13) . . . . ? 
C68 Fe2 C74 C70 166.5(6) . . . . ? 
C67 Fe2 C74 C70 126.1(6) . . . . ? 
C72 Fe2 C74 C70 -81.2(6) . . . . ? 
C69 Fe2 C74 C70 -163.3(9) . . . . ? 
C66 Fe2 C74 C70 85.4(6) . . . . ? 
C71 Fe2 C74 C70 -37.4(5) . . . . ? 
C73 Fe2 C74 C70 -118.3(8) . . . . ? 
C3S O1 C2S C1S 165(2) . . . . ? 
C2S O1 C3S C4S 167.8(15) . . . . ? 
C7S O2S C6S C5S 179(2) . . . . ? 
C6S O2S C7S C8S -172(3) . . . . ? 
  
_diffrn_measured_fraction_theta_max    0.986 
_diffrn_reflns_theta_full              27.89 
_diffrn_measured_fraction_theta_full   0.986 
_refine_diff_density_max    1.549 
_refine_diff_density_min   -0.955 
_refine_diff_density_rms    0.158 
